# Supplementary material for: Transfer RNAs Mediate the Rapid Adaptation of Escherichia coli to Oxidative Stress
Source: PLoS Genet. 2015 Jun 19;11(6):e1005302. doi: 10.1371/journal.pgen.1005302 (PMC4474833; doi:10.1371/journal.pgen.1005302)
Supplement: S1 Table — Data obtained in E. coli BL21(DE3) and BW25113 strains are included. (XLS) [file pgen.1005302.s008.xls]

## Sheet: BL21 Normal Condition
Gi	2min	5min	10min	15min	20min	30min	40min	50min	60min
gi|16131218	9.4	19.71	9.32	6.68	8.42	2.72	1.86	1.55	1.07
gi|16131219	31.13	19.4	6.71	5.85	10.03	2.21	1.7	1.34	0.96
gi|16131600	24.78	16.76	4.49	6.84	5.99	2.86	2.05	1.45	1.02
gi|16131602	21.86	16.48	6.54	7.11	4.69	3.03	1.97	1.4	1.03
gi|16128107	23.69	16.15	7.94	11.18	7.08	8.49	4.25	5.58	4.06
gi|16129202	11.84	10.01	6.24	7.85	9.91	8.62	5.35	4.7	4.38
gi|16129733	8.24	14.13	7.31	7.51	9.6	3.34	2.91	1.86	1.19
gi|16131102	19.9	9.86	10.44	5.77	1.76	2.21	1.53	1.22	0.97
gi|16130340	12.6	3.39	7.67	5.43	4.39	2.27	1.83	1.6	1.22
gi|16131968	18.06	6.2	9.69	1.74	6.2	2.24	1.57	1.67	1.05
gi|16131632	17.95	14.93	8.06	6.63	8.31	3.68	3.22	1.79	1.39
gi|16131182	47.24	25.3	7.05	5.08	3.46	2.16	1.73	1.57	0.97
gi|16131999	15.98	10.81	6.29	6.87	5.16	3.36	2.26	1.65	1.23
gi|16131678	29.68	17.08	9.6	5.81	4.16	1.97	2.06	0.99	0.68
gi|16129170	19.72	14.76	5.68	6.08	2.32	2.75	2.01	1.43	1.46
gi|16131850	43.2	32.92	11.85	22.13	25.87	11.52	4.48	4.02	3.68
gi|16130342	12.16	6.32	5.63	6.08	7.59	3.63	1.47	1.49	1.03
gi|16130033	26.37	13.48	11.54	13.41	9.44	7.7	6	4.04	2.45
gi|16131794	14.22	15.04	10.21	7.25	8.77	4.48	1.76	1.84	1.46
gi|16128895	14.57	12.97	9.22	5.67	3.98	2.53	1.75	1.3	1.07
gi|16130513	13.67	7.28	5.11	6.27	2.97	3.21	3.73	2.72	1.75
gi|16128421	13.49	9.57	7.87	6.21	7.63	2.19	3	1.26	0.91
gi|16130814	13.63	11.75	6.34	4.84	4.49	2.41	1.51	1.05	0.74
gi|16128108	18.36	15.32	12.76	13.36	11.06	8.58	5.66	5.7	4.17
gi|16128162	4.92	14.5	6.66	5.77	3.54	2.07	1.61	1.19	1.21
gi|16129715	11.64	10.52	2.81	14.54	8.96	6.47	3.9	3.26	2.5
gi|16130604	28.12	11.76	10.59	7.8	3.87	3.43	2.01	1.66	1.32
gi|16130218	15.1	11.94	3.12	6.03	1.97	2.43	1.07	1.69	1.34
gi|16130686	19.11	10.08	7.01	5.03	6.21	2.68	3.62	2.1	1.73
gi|16131597	29.86	17.59	11.63	4.9	10.61	4.16	1.78	1.81	1.43
gi|16130482	12.7	9.37	4.87	4.29	0.87	2.14	1.86	1.38	1.01
gi|16131293	6.68	6.69	5.85	3.46	4.85	2.46	3.25	2.27	1.96
gi|16128698	13.63	10.46	3.75	3.69	3.66	1.25	0.98	0.82	0.74
gi|16131056	15.2	6.7	7.68	3.59	2.64	1.82	1.82	1.24	1.02
gi|16131307	8.76	18.37	7.99	10.87	8.15	5.62	3.58	2.58	1.82
gi|16128027	27.33	9.17	10.57	6.67		2.52	2.27	1.42	1.06
gi|16128878	27.13	11.38	7.11	3.88	7.89	1.83	2.25	1.48	0.9
gi|16129249	10.38	14.99	6.71	7.26	5.7	3.39	1.92	1.33	1.08
gi|16128109	16.96	13.29	8.44	4.45	7.57	2.95	7.4	1.88	1.51
gi|16128187	18.28	12.62	3.68	5.69	4.53	2.48	2.8	1.33	1.04
gi|16129771	2.37	8.05	4.72	8.95	3.85	5.43	3.94	2.85	1.82
gi|16130671	30.7	10.22	5.14	3.89	3.12	1.62	1.29	1.33	1.2
gi|16130827	11.24	12.44	7.29	7.45	5.98	5.66	3.9	4.25	1.87
gi|16128870	6.34	3.96	3.85	3.18	2.61	1.58	0.91	0.6	0.41
gi|16129669	29.88	10.87	4.29	5.18	6.75	2.29	1.6	1.19	0.91
gi|16128422	12.16	17.7	6.55	9.39	5.28	4.58	2.28	1.92	1.36
gi|16130432	19.8	7.9	4.8	3.47	3.99	1.85	1.47	1.19	1.01
gi|16128111	12.22	8.88	6.1	3.47	5.47	1.64	1.29	0.88	0.74
gi|16131430	7.02	8.66	4.13	6.63		3.55		1.57	1.25
gi|16131711	17.37		4.69	3.87	3.66	2.04	1.66	1.21	0.92
gi|16130839	22.26	14.92	9.25	5.23	2.21	2.99	2.84	2.66	1.3
gi|16131710	10.65	21.95	10.19	17.91	2.2	20.12	1.04	7.09	5.32
gi|16128716	7.17	13.2	5.38	6.18	4.76	2.52	1.98	1.51	0.98
gi|16131187	19.92	14.58	5.72	4.59	6.02	1.88	1.78	1.33	0.96
gi|16131139	8.2	16.56	13.43	5.31	2.24	2.34	2.25	1.46	1.08
gi|16130433	20.66	4.11	3.74	3.94	2.84	1.74	1.5	1.18	0.96
gi|16131845	17.53	3.42	5.47	4.11	5.77	2	1.23	1.26	0.96
gi|16131815	8.76	27.85	13.46	5.95	3.74	2.27	1.79	1.54	1.02
gi|16130476	8.41		9.09	5.86	7.91	2.85	3.61	1.19	0.85
gi|16131628	19.47	13.58	4.55	5.52	2.91	1.83	1.3	0.98	0.66
gi|16131680	20.12	8.56	2.91	11.92	9.78	4.23	2.74	2.73
gi|16131798	103.18	1.55	1.22	11.28	22.31	4.52	3.35	4.66	1.76
gi|16128091	24.42	9.39	4.29	4.87		2.5	1.6	1.29	0.86
gi|16131629	15.31	11.04	3.48	4.89	7.09	1.91	1.48	0.91	0.74
gi|16128897	14.57	16.91	3.18	5.33	3.08	2.17	1.48	1.22	0.82
gi|16128899	15.11	5.6	6.83	7.71	5.53	2.86	2.65	1.87	1.5
gi|16130232	10.9	9.78	8.82	8.17	4.78	4.1		2.64	2.32
gi|16128159	32.13	19.22	22.51	9.15	8.55	4.86	3.18	2.93	1.69
gi|16128695	22.08	1.95	6.77	3.74	6.66	2.16	1.37	0.91	0.61
gi|16129802	3.19	14.27		8.38	3.49	2.66	2.22	1.58	1.33
gi|16130439	17.68			5.6	4.03	2.39	1.86	1.57	1.1
gi|16131836	26.81	13.03	2.13	4.56	5.63	2.43	1.44	1.26	1.03
gi|16131063	8.68	12.04	7.2	13.06	7.58	9.67	4.74	2.93	2.19
gi|16131174	26.25	4.55	5.11		3.66	2.44	2.04	1.64	1.06
gi|16131060	16.99	15.67	6.23	5.25	4.12	2.23	1.59	1.34	0.98
gi|16131639	3.9	9.04	6.6	6.79	3.86	1.88	1.7	1.35	1.07
gi|16130658	13.85	6.75	3.17	2.36	1.88	0.93	1.17	0.74	0.68
gi|16131567	16.37	10.83	6.54	5.26		2.7	1.33	1.53	0.98
gi|16131880	19.46		4.41	6.77	2.35	2.14	1.9	1.13	0.68
gi|16128008	10		7.54	4.28	5.81	2.62		1.46	0.93
gi|16129960	5.39	5.29	3.73	4.96	3.43	2.95	2.69	2.15	1.63
gi|16131630	27.66	13.46	7.9	4.98	6.55	2.06	1.7	1.26	0.76
gi|16130670	20.76		5.15	3.51	3.28	1.43	1.09	1.37	1.35
gi|16130792	5.34	11.7	1.31		10.2	2.93		1.21	1.37
gi|16131198	50.78	18.93	9.07	5.54	5.21	2.21	1.48	1.34	1.56
gi|16131779	44.72	15.41	2.33	3.82	2.34	2.13	1.64	1.2	1.09
gi|16130836	11.77	7.15	4.07	8.6	6.92	3.38	1.46	1.71	1.23
gi|16132025	5.8		9.72	7.09		1.48	1.7	1.11	1.01
gi|16128702	18.46			4.2	3.18	1.44	0.55	0.65	0.48
gi|16129970	3.8	16.7	3.9	4.14	6.8	2.43	1.47	1.33	1.02
gi|16131184	13.35	15.01	5.41	6.36	4.47	2.27	1.59	1.39	1.65
gi|16131764	4.82		1.42	NA	2.04		2.02		13.41
gi|16127996	0.84		5.01	4.79	3.96	1.91	2.34	1.33	0.73
gi|16128002	4.97	14.44	5.55	8.99	5.57	3.83	2.54	1.89	1.21
gi|16130219	2.35	13.17		4.77	4.72	1.92	1.56	1.24	1.45
gi|16128701	15.11	11.02	5.8	3.27		0.99	0.73	0.42	0.36
gi|16128924	10.22	14.99	6.6	8.36	5.86	3.03	3.15	1.82	1.27
gi|16129058	8.82	13.32	5.55	5.56	5.46	2.72	2.17	1.66	1.02
gi|16130521	5.17	0.85	2.32		2.12	2.56	2.3	1.1	2.14
gi|16128020	15.59	0.53	5.78	5.82		2.73	1.67	1.57	1.17
gi|16128163	43.11	27.37	9.25	7.31	4.42	2.44	2.39	1.7	1.08
gi|16128860	25.11	8.75	7.59	4.4	2.31	3.92		1.95	1.27
gi|16129072	1.88	19.72	2.61	7.09		13.25	6.18	12.83	3.44
gi|16129198	1.26	7.31	8.64	6.02	6.48	2.11	1.62		1.11
gi|16129819	1.6	8.09	9.56	6.58		2.44	1.18	1.41	1.07
gi|16128874	7.63	10.62	5.69	4.12	2.66	1.92	1.16	0.86	0.57
gi|16128896	5.31	8.98	5.7	3.31	5.03	2.38	4.09	3.22	0.94
gi|16131199	40.68	16.93	8.97	4.72	3.61	1.92	1.61	1.47	1.01
gi|16131778	0.58	2.61	5.2	4.28		1.96	1.31	1.62	1.6
gi|16128703	10.73	14.65	5.75	5.13	3.12	2.16	0.99	0.64	0.51
gi|16128875	31.25	7.84	5.89	4.73		1.74	0.86	0.76	0.48
gi|16130443	15.66	13.45	3.21	3.37	2.59	1.31	1.54	0.74	0.57
gi|16130843	8.67	11.94	2.62	5.63	3.09	2.34	2.68	1.64	1.06
gi|16131068	3.4	3.82	8.36	3.21		3.08	1.27	1.17	0.86
gi|16131126	5.23	20.34	11.89	10.01	3.97	4.93	3.8	1	0.7
gi|16129285	3.21	9.71	9.75	3.36	2.22	2.38	1.31	0.79	0.5
gi|16129614	17.21		8.16		10.67				6.41
gi|16129632	3.37	4.56	1.39			2.81		1.19	1.56
gi|16130091	15.54	7.73	4.61	4.61	3.13	2.05	1.22	1.02	0.59
gi|16131488	13.49		2.3	0.25	1.04	8.22	3.03	10.71	0.72
gi|16132082	5.03	16.84	10.04	4.6	8.79	5.45	2.95	2.01	1.34
gi|16128223	23.54	26.8	8.01	8.62	11.25	5.94	2.16	3.09	2.11
gi|16130166	20.85	7.95	6.36	3.81		2.74	1.66	1.46	1.01
gi|16129221	7.53		4.17		3.52	2.74	1.64	1.25	0.9
gi|16131119	35.82	16.46	4.62	7.69	4.61	3.24	2.31	2.84	1.45
gi|16131236	22.33		0.75	2.18		3.68	2.33	1.48	1.15
gi|16131754	21.74	9.46	3.12	8.66	5.02	4.62	3.06	2.04	1.57
gi|16131777	14.9	18.91		5.98	3.97	2.54	2.74	2.31	1.22
gi|16132080	9.31	10.57	6.4	3.31		2.29	1.54	1.77	1.08
gi|16128723	9.06		8.44	3.75	4.38	2.9	10.68	1.45	0.91
gi|16130247	20.93	14.3	5.98	4.25	3.66	2.03	1.18	1.17	0.87
gi|16131818	15.72	1.09	5.09	4.71		2.31	1.53	1.14	0.89
gi|16128190	3.97		6.1		1.64		1.63	1.19	2.42
gi|16128447	0	4.33	0.28	3.96	6.74	3.53	2.38	1.72
gi|16128850	8.6		3.57	3.46		1.41	1.01	0.49	0.33
gi|16129807	22	13.92	1.01	6.43	3.01	3.86	1.25	1.58	1.37
gi|16130231	6.04		3.52		3.85	4.48	3.42	3.35	2.36
gi|16131144	0.52		9.41	8.02	5.39	2.65	1.97	1.14	1.03
gi|16131220	53.31	13.75	7.85	6.4	3.62	2.05	1.78	1.55	1.58
gi|16131283	0.32			10.48		2.55		1.08	0.9
gi|16131603	52.42	27.39	15.52	6.4	6.67	3.16	1.77	2.21	4.77
gi|16131704	16.18	16.31	0.63	7.35		4.05	2.21	2.5	1.63
gi|16128066	36.21	2.04	3.43	3.02	3.09	1.4	2.03	1.61	0.43
gi|16129963	1.78	7.76	3.99	5.84	5.58	3.33	3.06	2.87	1.74
gi|16129965	4.92	7.61	3.33		3.08	1.92		1.02	1.57
gi|16130188	2.87		2.18	5.8	4.96		2.14	1.48	1.12
gi|16130221	11.03	13.99	5.47	6.25	3.11	2.73	1.66	1.79	1.41
gi|16131103	18.1	10.73	15.02	6.85	6.92	2.55	1.79	1.18	0.94
gi|16131814	17.25	16.65	5.01	5.1	3.96	1.89	1.57	1.65	1.8
gi|16128178	2.99	14.04	2.72	6.8	3.05	2.6	1.73	1.4	1.17
gi|16129056	2.54	17.69	4.31	7.4	3.43	2.92	1.46	1.31	0.72
gi|16130348	7.04	3.2	1.51	1.3	0.85	0.55	0.52	0.57	0.42
gi|16132054	2.81			9.71	2.17		2.32	1.01
gi|16132208	8.87		3.56			2.43	1.76	1.44	1.18
gi|16128715	2.7	7.86	0.52	3.08	2.07	1.51	1.16	0.87	0.62
gi|16129223	2.18			6.2	0.78	2.12	1.56	1.22	0.72
gi|16129679	9.75		9.96	0.69	1.87
gi|16130455	5.14	4.58		2.39	1.18	0.58	0.46	0.35	0.24
gi|16130805	7.94	4.64	2.86	3.67		3.23	0.83	1.85	1.51
gi|16130826	14.57		6.79		10.79	4.66	4.98	7.86	2.03
gi|16131490	11.95		2.42	4.66	3	3.76	2.96	3	1.61
gi|16131569	22.72	14.09		6.64	7.1	2.65	2.83	1.47
gi|16128068	10.42	2.27	5.56	3.55	1.26	0.72		0.3	0.22
gi|16128170	4.84	13.31	3.87	4.37		2.25	1.48	1.11	0.81
gi|16128656	13.97	9.1	6.44	5.84		2.91		1.41	1.17
gi|16129605	1.35		4.4					1.15
gi|16129962	3.58	9.45	4.47			2.3	3.64	2.82	1.31
gi|16129966	2.12		5.78	0.55	2.2	3.87
gi|16130029	28.84	16.86			7.93		6.69	3.4
gi|16130702	12.94		1.83			4.21	3.62	2.27	1.5
gi|16131091	22.75	7.11	9.51	5	2.86	2.66	2.21	1.44	1.23
gi|16131304	9.02					7.96		1.06	1.97
gi|16129224	3.02		4.48	6.13	4.98	3.42	1.96	0.74	0.71
gi|16129570	9.75		0.5		2.71				2.03
gi|16129754	1.47		3.7
gi|16129961	5.3	8.39		7.4	6.17		1.71	2.57	2.01
gi|16130403	3.6	9.03	4.18	5.12	1.92	2.78	1.33	1.07	0.9
gi|16130600	0.28		1.35		5.68	4.48	0.47	4.22	1.52
gi|16131054	2.64	3.64		1.52	0.87	1.23		1.09	1.54
gi|16131839	6.46		4.55	3.81	2.56	2.79	1.93	1.42	1.02
gi|16128832	2.28	20.15		11			3.73	3.24
gi|16129077	6.62		3.14	5.94		3.13		1.48	0.98
gi|16129178	1.5		6.82		5.41		2.3	1.87	0.57
gi|16129222	3.55		13.32				1.22
gi|16129675	3.78			6.1	6.98			1.97	2.74
gi|16129969	0.06	0.8		9.25		2.34	1.53	1.24	0.85
gi|16130041	1.51		8.15	1.58	3.69	2.36	1.69	5.5	2.19
gi|16130440	7.08	10.32	2.74	2.93	1.6	2.5	1.97	4.37	1
gi|16130963	2.03	5.29		6.86		2.3	0.58	1.17	0.97
gi|16131061	2.14		2.92		1.17	2.47		1.24	0.85
gi|16131884	12.96		7.51	2.39	2.7	1.95	0.81	2.99
gi|16132234	1.94			4.31			1.8	1.49	1.39
gi|16128192	6.57		5.09	6.24		1.98	1.5	1.95	0.82
gi|16128510	1.84	10.49			3.64	3.41	2.14	2.32	1.12
gi|16128611	5.86	8.11	1.7	4.08		2.51	1.52	1.35	1.1
gi|16128625	8.99		2.36	5.69		2.6	1.92	1.55	0.99
gi|16128650	15.43		3.13	6.48	3	6.15		1.91	1.56
gi|16128779	6.49		5.17		0.45	8.6	2.18		2.42
gi|16129207	5.22					9.36	5.7		4.92
gi|16129497	21.36	10							1.33
gi|16129855	21.18	9.74	5.39	5.81	4.63	5.03	4.48	2.7	4.33
gi|16130169	1.2		7.37	8.78		3.17		1.31	1.19
gi|16130401	6.77		5.55	5.16		2.81	1.86	1.5	1.08
gi|16130807	2.04	4.4		2.91			1.25	0.94
gi|16131282	1.19		7.96	3.22	6.3			1.56	1.38
gi|16131399	11.02	11.52		2.77	3.24	2.21	1.16	1.11	0.76
gi|16131487	13.45		1.81		3.61	1.84	5.46	5.85
gi|16131824	2.62	12.78	5.39	1.88		1.22			0.31
gi|16131861	9.21	4.62	1.62	4.08	2.51	2.89	2.55	2.61	2.53
gi|16128914	5.97			3.3	2.16	4.31	1.4	0.69	1.68
gi|16128980	2.54		2.76	2.96				0.86	0.65
gi|16129781	3.76	18.33			2.39		1.88	1.14	1.1
gi|16130250	10.99	13.28		6.53	5.25	2.56	1.4	1.13
gi|16130320	7.79	12.54		4.61	3.65	3.28	2.91	3.16	1.47
gi|16131077	1.43						0.6
gi|16131087	1.93	7.54		6.3		4.5	2.62		1.57
gi|16128638	0.66		20.94		0.78			3.08	2.37
gi|16128643	1.25	5.99	5.87			1.86	1.99	1.46
gi|16128722	6.91		2.22	2.56	3.89	0.76	0.92	0.73
gi|16128855	1.16	6.89	2.85	6.05	1.51	2.51	1.6	1.07	0.85
gi|16130255	0.96		4.59		3.97	3.76	1.61	1.78	1.13
gi|16128173	2.16	18.66	6.59	8.84			2.25	4.45
gi|16129063	13.87	8.98		4.26	2.09	2.25	1.36	1.92	0.76
gi|16129773	8.27	10.55		9.74	3.24	5.25
gi|16130427	1.92			4.81		3.02		1.35	1.62
gi|16130640	18.29			3.93		3.73		1.81	0.88
gi|16131796	3.45	0.26	13.98		1.33		6.11	2
gi|16131862	6.06			2.54	2.71	1.44		2.05	1.57
gi|16131867	1.21			7.28		3.22		1.03	1.44
gi|16131939	1.79		10.86		1.25	1.05		0.73
gi|16131994	1.14		7.32		5.42				1.06
gi|16128408	4.05	7.99	2.52	4.8		2.48			0.92
gi|16128768	2.51		4.64					3.53
gi|16128869	2.68	6.01		6.27			1.77
gi|16129025	3.68	7.74	0.05	5.03	3.69	2.32	1.6	0.85
gi|16130187	7.48	9.36	2.35	4.71	4.29	2.26	1.81	1.48	0.96
gi|16130441	4.73			3.04	3.67			1.59	1
gi|16130506	8.61		13.84	6.08	2.86		1.9	1.79	1.17
gi|16131169	3.74					3.34	2.66	0.98	1.05
gi|16131180	0.62	7.85		4.55		1.87	1.8	2.19	0.94
gi|16131266	19.63			5.07		2.26		1.34
gi|16131424	5.1		5.88	2.91	2.85		1.97	1.65	0.98
gi|16131964	0.83	16.38	3.72			1.78			2.55
gi|16131995	8.98		6.8	2.75		3.44	2.41		1.22
gi|16132273	9.28					2.1	1.37
gi|16128067	1.33	8.64	0.52	2.77	2.08	0.96	0.89	0.57	0.45
gi|16128807	6.26		0.87	5.21					1.4
gi|16128922	9.84					2.31			1.1
gi|16130107	1.84						3.64
gi|16131635	0.77					2.15
gi|16128126	0.67		1.19			5.94		1.24
gi|16128399	0.36						1.84
gi|16128747	0.47			4.03		1.96		1.44	1.14
gi|16129299	4					2.43	2.44		1.5
gi|16129374	0.86							0.74	1.27
gi|16129702	2.81					2.56
gi|16129981	4.24		12.9
gi|16130451	10.65						1.11		0.75
gi|16130659	0.91	6.74	3.65	2.24		0.79	1.11	0.85	0.57
gi|16131267	0.66							8.44
gi|16131398	0.7
gi|16131705	1.54		4.59				1.92
gi|16131835	17.12				2.8	3.04	3.54	1.48	1.12
gi|16131945	1.9								15.57
gi|16128073	1.78	7.43	1.31		1.42		0.77	1.18	1.08
gi|16128088	1.68		3.76	4.73		1.82	0.95		0.7
gi|16128361	2.21						0.97
gi|16128379	2.38						2.12	1
gi|16128423	0.03					1.72	0.15		0.54
gi|16128557	1.04	0.14		0.27		0.38	0.31	0.15
gi|16128662	1.59		0.97
gi|16128930	5		3.35		7.23	4.65		1.55	1.2
gi|16129245	0.93
gi|16130021	11.45					0.84			0.26
gi|16130390	14.77								2.81
gi|16130492	2.53			7.46	2.81	2.4	1.35		0.87
gi|16130516	2.42	0.29		3.44	3.22	2.55	1.33	0.94
gi|16130652	0.86							1.98
gi|16131092	1.22						2.61		0.89
gi|16131206	8.84			5.91			1.81	1.53
gi|16131879	1.88				1.39		2.91
gi|16128023	8.37						1.61	1.3
gi|16128054	3.67
gi|16128083	0.9
gi|16128102	3.76	2.08				2.35
gi|16128553	2.72								1.25
gi|16128587	7.5						1.88	1.33
gi|16128645	4.65
gi|16129031	3.13
gi|16129144	15.2								1.44
gi|16129837	0.96			0.39
gi|16129914	18.73		1.22		3.86
gi|16130199	0.53
gi|16130249	0.09
gi|16130602	0.63
gi|16130950	1.53					3.87	2.02
gi|16131246	4.78					3.53			3.54
gi|16131371	2.8		2.95
gi|16131456	2.73
gi|16131476	1.8	0.84
gi|16131482	4.86		4.83		1.22		1.54		0.69
gi|16131658	4.61	1.81		1.44		0.75		0.4	0.23
gi|16131844	3.2				1.83		1.41	1.61
gi|16131967	1.7		5.96				2.06
gi|16131817		6.11	6.47	4.32		2.1	1.33	1.09	0.82
gi|16130190		4.13	3.31	4.77	5.36	3.02	2.01	1.34	1.08
gi|16129225		7.39		9.21	4.44	2.89	2.7	0.89	0.76
gi|16128891		0.19	6.43	5.93		2.15	2.11	1.29	0.9
gi|16130931		6.03	0.13	9.5		3.04		1.49	1.32
gi|16129658		7.81	5.51	8.5		2.76	1.59	1.22	1.08
gi|16128708		24.42					3.05	5.93
gi|16129099		8.42	3.21	3.58	4.9	1.41	0.92	0.64	0.48
gi|16128644		10.69	3.68	2.99	2.64	1.74	1.13	0.97	0.73
gi|16130436		8.07	7.46	3.72	3.17	1.76	0.88	0.98	0.91
gi|16130258		21.08	2.26	7.84	6.54	2.15	2.04	1.34	1.18
gi|16130527		12.5			1.3	2.07	2.29	1.33	1.08
gi|16131769		6.43		8		4.53		1.4	0.91
gi|16128053		5.98				2.43	1.5		1.16
gi|16130738		4.12	3.72			3.53	2.13	3.03	0.96
gi|16131955		9.2	6.66			7.77	2.1	21.08	8.38
gi|16129341		0.42	11.77		5.51	1.74		8.42	3.39
gi|16129643		15	9.85	6.49		3		1.5	1.68
gi|16130458		6.78	2.86	2.01	2.22	1.46			0.8
gi|16131370		17.09	5.98	3.89		3.63		1.66	0.92
gi|16128769		9.7	8.05				1.69	1.39	0.76
gi|16128025		10.63	2.32	2.6	3.15	4.4		4.3	1.98
gi|16129784		6.14		2.26		1.7			0.9
gi|16129805		21.16	2.5	8.79		4.81			1.48
gi|16131483		15.19	8.33			2.47	2.95	1.79	1.67
gi|16128048		7.25	5.15	6.49		3.14	0.73	1.26	1.03
gi|16128229		1.36							1.36
gi|16129138		5.99	8.52		3.29	1.86	2.25	1.63	1.05
gi|16129247		14.15	3.62	3.55		1.59	1.39	1.19	0.75
gi|16129670		26.08		7.41	2.73	3.09	2.12	0.97	0.89
gi|16130229		13.11	8.65	7.92	6.38	5.23	2.89	1.5	1.49
gi|16131120		15.27	5.74	6.16		2.35	1.73	1.18	1.12
gi|16131996		10.1		6.26	4.63	3.1	0.5	1.11	1.18
gi|16128165		14	0.57	3.65	2.36			1.01
gi|16130742		8.16		4.75		2.54			0.85
gi|16131601		18.43	5.99	6.6	4.07	3.01	1.71	1.32	0.97
gi|16131812		1.57	5.24		2.88	2.51	1.41	1.81	1.08
gi|16128160		6.21				2.91		1.36
gi|16128272		3.16		17.33		1.87		1.49	1.61
gi|16128615		10.8	2.21	3.61	1.39	2.5	1.77	1.29	0.72
gi|16129660		5.06		6.43	0.83	3.05	0.86	1.44	1.33
gi|16131135		0.2		3.2		2.3			0.64
gi|16128590		17.63				7.62			7.05
gi|16128782		9.08	2.94	7.09	2.94	4.74			2.02
gi|16128996		16.02	1.73	7.06	2.26	2.26	2.28	0.99	0.93
gi|16129093		1.93		2.32		2.57	0.79	1.34	0.81
gi|16129150		9.02				2.02		1.72
gi|16130494		19.72	0.91	5.3		2.58			1.11
gi|16130687		7.68	12.58	3.13	5.07	2.71		1.89	1.21
gi|16131038		9.24	14.63	4.4	2.98	2.83			0.94
gi|16131095		6.79	4.17	1.5	4.47	4.04	1.99	1.18
gi|16131200		15.67	6.81	5.08	2.08	1.79	1.55	1.03	0.95
gi|16131641		18.33
gi|16128228		0.22	5.13				1.75
gi|16128788		4.57	1.93			1.89			0.89
gi|16129498		20.85	3.31	10.71	4.08	5.02	3.39	1.74	1.68
gi|16129596		9.07	11.54	8.64		3.63	3.13	1.93	0.89
gi|16130071		0.11	1.14			4.2	1.93		1.42
gi|16130457		14.15	4.77	6.47		1.74	2.07	1.72
gi|16131800		11.02		4.14		2.27	2.01		1.09
gi|16128457		16.07	1.24	10.45			2.04	1.6	0.84
gi|16128506		7.1	2.95	4.95	3.17	2.5	2.11	1.61	1.1
gi|16128588		14.34	21.81	10.09	8.16	5.47	2.68	2.21	1.17
gi|16129054		1.2	5.02			2.89	1.21	2.06	0.3
gi|16129080		8.83		11.58		2.63	1.68	1.28
gi|16129163		4.33
gi|16130239		2.61			0.57
gi|16130397		1.51		4.12		3.29	1.68	1.19
gi|16131079		12.73		4.52	2.5	1.96	3.58	1.76
gi|16131302		5.91		2.8		3.19		3.21
gi|16131413		15.11	3.67	3.67		7.22	1.15	5.45
gi|16131416		20.88			4.27	6.53		3.18	2.01
gi|16131513		26.22	1.18	14.41	2.58
gi|16131823		9.09	6.5	3.92		2.45	1.51		0.35
gi|16131885		7.56	3.32	8.22	2.24		1.62		1.25
gi|16132201		2.05	7.55		2.86		1.82	1.5	1.12
gi|16127997		8.94	3.31	6.13	1.7	2.4	1.64	1.08
gi|16129616		11.11		6.69	1.52	3.2	1.96	1.02
gi|16129620		12.64	0.47	6.72		5.57		2.63	1.6
gi|16130402		1.74					0.94	0.94
gi|16130421		11.05					2.45
gi|16130606		3.31	2.54	3.88				1.47	1.2
gi|16131175		19.49	6.82	6.1	6.04	2.21	1.71	1.92	0.82
gi|16131665		7.91				2.71	1.57		1.07
gi|16127998		17.64	4.16	5.73	2.55	2.58	1.34	1.43	0.84
gi|16128119		16.71	6.65	6.99	7.26	2.45	1.18	1.62	0.54
gi|16128400		2.16	4.19	6.04	7.23		2.29	2.78	1.15
gi|16128699		15.62	5.27	4.81	3.95	1.31	2	1.27	0.57
gi|16128833		30.07		26.57
gi|16129233		5.28		4.23		1.08
gi|16129236		1.9			4.37	2.56
gi|16129248		5.31
gi|16129595		15.77	2.53	7.56	3.13	2.53	3.23	1.3	0.9
gi|16129611		2.25		2.19				2.53	1.29
gi|16129633		16.78		9.99					1.52
gi|16130006		12.99	1.06	5.19	4.73	2.78	0.97		1.34
gi|16130081		10.08		5.5				1.99
gi|16131189		15.58	3.39	5.73		2.11			1.02
gi|16131576		1.21
gi|16131612		6.04		8.39		6.93	2.81	6.36	5.22
gi|16131707		1.16		5.66	1.6	1.61	1.95	2.68
gi|16131757		5.26	12.47	6.31			3.26	1.16	1.56
gi|16132182		1.62
gi|16128127		2.88	4.47	9.53
gi|16128856		32.94	26.72			5.28	1.92	1.7	1.31
gi|16128915		13.2		3.69		1.31
gi|16129152		1.59
gi|16129339		0.16		1.09				5.47	2.82
gi|16129681		15.64		5.58		2.97		0.79	0.93
gi|16129683		0.86		6.27				1.63
gi|16130337		0.19	3.68	1.13		1.12		1.07	1.01
gi|16130837		0.25
gi|16130894		5.58		6.19		7.02		2.44	2.08
gi|16131041		11.01			3.96
gi|16131194		23.23		5.56	0.75	1.91	2.26	1.36	0.97
gi|16131443		2.97				3.73	1.55
gi|16132067		10.96	3.01	8.83		4.48
gi|16132218		16.97	4.35			3.82			0.83
gi|16132222		10.89	3.32		3.15				0.88
gi|16128071		5.26	3.54	3.23		1.77	1.2	0.67
gi|16128095		7.86	6.19	7.63		3.5
gi|16128373		1.94	2.56	4.32		1.8	1.68	0.93
gi|16128430		11.07
gi|16128442		0.87
gi|16128686		1.45	6.46				1.98
gi|16128696		0.54		0.22		1.24			0.74
gi|16129199		7.45						1.42
gi|16129649		17.71		5.11		3.88	0.69
gi|16129957		8.15		5.51	4.21	3.8		2.52	1.59
gi|16130042		11.94					2.27
gi|16130343		1.82	6.11	2.58			2.71	0.76	1.33
gi|16130479		1.52
gi|16130489		10.25	0.8	7.92
gi|16130507		4.24		4.21
gi|16130669		10.66	3.55	0.11		1.84		0.86
gi|16130717		3.46			4.45			2.41
gi|16130849		0.83	2.63					1.77
gi|16130965		3.06
gi|16131052		0.22
gi|16131082		4.21	5.4	3.25
gi|16131605		18.47		6.76
gi|16131869		1.52		1.02
gi|16131903		4.01		3.19
gi|16131997		3.54	2.17	3.12	1.23		1.18
gi|16132024		15.43		5.12		2.14			1
gi|16128043		0.96
gi|16128652		4.31
gi|16128797		1.88				1.6			0.55
gi|16128998		0.8
gi|16129443		7.35
gi|16130072		3.77
gi|16130913		0.27
gi|16130952		8.6						1.13
gi|16131138		12.82		5.98		2.83
gi|16131128		12.82
gi|16131442		24.5
gi|16131472		1.86
gi|16131608		2.59	3.74	1.98		2.46		1.15
gi|16131636		8.91							1.04
gi|16131865		5.64
gi|16132195		49.23					4.34	2.84	11.8
gi|16131604			4.79		2.72		1.89
gi|16131851			7.09		7.58				2.63
gi|16129204			5.32	1.99					3.13
gi|16131841			1.4		1.78	7.92		4.2	2.9
gi|16130350			3.19	3.13	2.15	1.45		0.97	1.06
gi|16131185			3.67						1.14
gi|16131816			10.76
gi|16130522			2.57	9	2.47	2.06	1.58	0.96	0.47
gi|16131860			3.5		3.46
gi|16129094			2.17	9.58		2.35	1.59	1.55	1.07
gi|16131238			1.31	7.64		5.55	2.14	1.47	2.45
gi|16130244			1.07
gi|16131280			1.61				1.08
gi|16128171			12.42						0.99
gi|16131177			4.56				1.24		1.03
gi|16131797			13.57				1.23		1.17
gi|16130848			4.03		1.99				1.43
gi|16128704			2.67	1.25	2.65		1.3	0.78	0.53
gi|16130330			1.73	5.38	3.1	2.7	1.88	1.42	1.25
gi|16129674			4.63	5.54		3.32	0.96	1.23
gi|16130424			2.33		1.76		2.15	1.88
gi|16131332			3.27					0.11
gi|16128787			2.17	5.11	5.49		1.65	1.27	0.73
gi|16131813			8.26		11.83	2.12		1.83	0.98
gi|16128458			1.24
gi|16131693			4.59	5.66		2.82	4.08	2.01	1.09
gi|16131795			4.23	27.82	7.21	5.86	2.68	2.08	1.8
gi|16130052			10.75	7.51	4.85	3.35	1.75	1.63	1.12
gi|16131367			8.26		2.78				1.8
gi|16128161			3.16	7.88		2.83		1.44
gi|16131262			2.51		6.47		1.42		1.19
gi|16131309			24.83	3.05	6.33		0.64	1.92	1.2
gi|16129047			9.79	5.39		7.05	1.78	1.57	1.09
gi|16129055			7.38						1.61
gi|16130520			4.86		4.32	2.57		0.85	1.07
gi|16130815			4.06						2.04
gi|16131121			4.47		1.5	5.38	1.72	1.18	1.04
gi|16131877			4.78		1.98
gi|16128208			15.13		5.97			3.48	0.77
gi|16128411			3.77						1.28
gi|16128419			1.76	4.29	2.19	2.75	1.75
gi|16128651			3.9			2.39			1.1
gi|16129294			1.57			8.46			0.09
gi|16129694			3.49		0.35
gi|16131166			1.91	5.04
gi|16131292			3.63	3.52	2.07	2.12		1.79	1.33
gi|16132022			8.86		0.55	2.1		1.04	1.01
gi|16132149			6.73				2.45
gi|16128047			3.95	2.88		2.84	2.1	1.02	0.97
gi|16128664			8.32		3.39	4.24			1.27
gi|16128780			6.06		2.97	9.31	1.47
gi|16129166			4.54				1.28	1.63
gi|16128065			3.82
gi|16128885			6.71			2.58		0.6	1.06
gi|16130599			3.65			4.47	4.95	3.87
gi|16130825			3.41	4.2	0.38			1.51	1.1
gi|16131066			2.03				2.42	2.1	1.35
gi|16131193			16.07	5.29		3.13	2.16	1.76	1.37
gi|16131541			0.81	4.13		1.97	1.71	1.24	0.95
gi|16128114			2.04	2.08
gi|16128120			1.34		3.01
gi|16128322			1.71	7.47	3.95	2.89	2.18		1.21
gi|16129593			15.55				2.61	3.4
gi|16130438			2.74
gi|16130657			2.65						0.61
gi|16130810			4.89	11.05	2.55	3.68	2.33	1.99
gi|16131598			11.58
gi|16128009			3.96
gi|16128075			3.42		2.11		2.66	1.17	1.4
gi|16129265			4.19
gi|16130423			3.59		1.19		1.85	0.73	0.64
gi|16131076			19.92						0.85
gi|16131160			5.87	4.34		3.52	1.3	1.04
gi|16131264			8.04
gi|16131599			4.56						0.72
gi|16131752			3.25
gi|16131972			8.17					1.14	0.96
gi|16128659			5.01			1.8	2.08	1.13	0.91
gi|16128982			2.46
gi|16130245			4.59
gi|16130405			5.52
gi|16131215			10.76
gi|16131767			2.2
gi|16131985			0.86		3.29	2.65	0.44	2.17
gi|16128078			2.64	2.63			3.03		1.13
gi|16128819			4.02			6	3.77
gi|16129926			3.49	4.92	9.02	3.39	2.3	1.6	1.02
gi|16129948			3.51
gi|16130019			7.9
gi|16130051			4.07		1.34
gi|16130496			2.25	5.5	2.63	2.44
gi|16130731			9.51		3.95	3.24		1.42	1.13
gi|16131088			7.34
gi|16131124			0.83
gi|16131167			1.3		2.41	3.41		1.15	1.56
gi|16131188			1.56					1.67	0.76
gi|16131336			1.27				0.56	3.02	1.11
gi|16131565			4.4
gi|16131748			4.54
gi|16128561			1.8
gi|16128970			7.74
gi|16129095			4.05				1.92	1.16	0.54
gi|16130347			4.76	3.05	6.96	1.36	2.2	1.14	0.93
gi|16131123			4.85		2.74	3.68	2.95		1.47
gi|16131242			2.86
gi|16131508			19.28	6.48
gi|16132198			9.83						2.18
gi|16128396			2.41
gi|16128490			1.29			3.34	0.36
gi|16128509			6.61	2.23	2.3	6.07	2.33
gi|16129237			10.36	7.67		4.45	1.52	3.22	2.4
gi|16129581			2.91	7.18	4.2		3.23	2.45	1.76
gi|16129719			2.71			2.71	2.3	1.86
gi|16129803			8.02			5.75		3.34	2.48
gi|16130005			1		3.13		2.14	1.34
gi|16130446			0.93
gi|16130109			0.93
gi|16131071			2.27
gi|16131141			9.51				0.66		0.28
gi|16131162			3.36		0.85
gi|16131173			1.91	6.53	2.78	2.44	1.99	1.56	1.1
gi|16131303			0.44				1.07
gi|16131412			5.2	2.25				1.45
gi|16131479			2.74	2.13					0.56
gi|16131637			1.57
gi|16131690			2.99	5.43	3.66	2.76	1.78	1.39	0.79
gi|16128045			2.87
gi|16128864			2.55
gi|16129086			1.63
gi|16129171			4.01
gi|16129208			5.1	3.47	0.88				3.18
gi|16129569			6.32
gi|16129599			0.91	4.56			2.75
gi|16129610			0.39
gi|16129677			4.19	5.87		2.7	2.81	1.87	1.73
gi|16130167			1.65
gi|16130254			3.78
gi|16130809			7.81	1.96			1.69	2.21
gi|16131116			2.72		2.42
gi|16131290			3.93
gi|16131642			2.72					1.76
gi|16131822			7.73			2.85	1.35	2.01	0.62
gi|16128113			4.22
gi|16128177			0.11	1.12				1.31	0.93
gi|16128567			1.1			0.52		0.06	0.37
gi|16128653			5.25
gi|16128795			8.13	3.71		3.13		1.52
gi|16129057			3.53
gi|16129167			1.06
gi|16129193			2.45		3.67			2.62	1.06
gi|16129572			4.6						0.8
gi|16129582			1.75			1.81		0.73
gi|16129612			1.57	5.83		3.26			1.73
gi|16129982			6.98
gi|16130123			8.03
gi|16130228			1.26
gi|16130351			3.42
gi|16130448			6.44	4.48	1.47	2.19		1.34	0.78
gi|16130583			19.27
gi|16130554			19.27
gi|16130949			11.41			4.16			1.19
gi|16131100			2.19						1.67
gi|16131134			2.25				1.93		1.2
gi|16131297			1.42
gi|16131425			2.95
gi|16131478			4.83
gi|16131570			6.6
gi|16131581			4.29
gi|16131592			6.67	9.11		2.93			0.77
gi|16131625			13.73
gi|16131685			2.86
gi|16131770			2.67					1.75
gi|16131801			3.17			2.48		1.49
gi|16128097			5.64
gi|16128150			1.01
gi|16128331			6.63		4.15
gi|16128460			2.52
gi|16128504			2.62
gi|16128507			2.08				1.87
gi|16128728			2.95
gi|16128775			0.44				1.33
gi|16128798			0.78
gi|16128997			1.1		2.86
gi|16129197			1.68			3.14	2.2	1.46
gi|16129139			1.68
gi|16129242			10.51
gi|16129333			7
gi|16129587			6.76
gi|16129741			1.9
gi|16129804			3.86					6.26
gi|16129827			2.16
gi|16129841			5.72
gi|16129856			52.64
gi|16129941			0.54
gi|16129964			1.93
gi|16129967			2.67
gi|16129988			6.95		1.34
gi|16130253			1.99			3.44		0.8
gi|16130276			0.01
gi|16130310			3.11
gi|16130464			14.3
gi|16130537			4.96
gi|16130650			4.97
gi|16130711			4.51
gi|16130798			5.07
gi|16131011			19.28
gi|16131288			7.77
gi|16131330			3.05
gi|16131358			1.73
gi|16131344			1.73
gi|16131520			5.26	3.3		1.81
gi|16131531			8.24	2.77	1.52	2.19	1.8		1.33
gi|16131701			2.05
gi|16131728			2.56
gi|16131805			0.35
gi|16131987			3.72
gi|16131992			2.76
gi|16132049			3.18
gi|16132066			3.24	5.8	2.82			1.97
gi|16132189			3.23	6.64	0.74		2.1	1.64
gi|16132166			3.23
gi|16132169			3.23
gi|16132250			0.26
gi|16131780				9.4	2.14	10.98	3.31	2.04	1.92
gi|16131075				4.09
gi|16128026				5.63	4.31	2.12	1.69	1.67	0.8
gi|16129235				0.38		2.12	0.18	1.15	1.07
gi|16130838				6.79	5.27	3.09	0.92	1.7	1.48
gi|16128297				2.75		1.21			0.38
gi|16130800				9		3.12	3.24		1.26
gi|16130866				2.99		1.97			1.04
gi|16128921				2.22		0.57		1.05
gi|16130691				18.97		3.37	1.77
gi|16131431				4.8			1.89	1.48	1.04
gi|16131799				8.74	0.41	3.92	1.5	1.81	1.66
gi|16128084				5.72	2.32		1.44	1.36	1.27
gi|16128143				0.25		0.84			0.18
gi|16128934				5.35		2.32	1.23		1.04
gi|16129608				0.25	3.53	2.71	2.5	1.74	1.07
gi|16130170				6.01	4.06	4.12	2.11		1.16
gi|16130189				5.26	6.36	3.81	1.58	1.76	2.87
gi|16130388				6.41	6.96	2.92		1.46	0.81
gi|16131192				5.02			1.93	1.61	1.02
gi|16132043				3.41					0.83
gi|16128142				4.23		2.08
gi|16128426				4.86		3.76		0.87	1.09
gi|16129560				5.55
gi|16130035				24.09		1.07		4
gi|16130184				2.96		2.7
gi|16130499				10.81
gi|16131148				7.55	4.78	4.03
gi|16131273				4.44		1.87		2.14	0.91
gi|16131515				4.2	1.69				1.46
gi|16128147				17.21	1.23		1.82	6.16	1.14
gi|16128155				2.3					0.24
gi|16129182				1.61
gi|16129232				6.06	0.85	3.55
gi|16129828				2.02		3.28			1.07
gi|16129908				3.53					1.86
gi|16130222				9.15		2.29	0.99		0.23
gi|16131176				5.86	3.28	3.05	1.65		1.02
gi|16131278				4.62		2.5
gi|16131526				4.72		5.42			1.29
gi|16128154				4.16		2.29			0.72
gi|16128454				5.7		3.01	1.44	0.91	1.57
gi|16128806				1.81			3.46
gi|16129011				5.01	1.87	2.49		0.91	0.9
gi|16129184				8.06	1.74			1.39
gi|16130130				8.04
gi|16130338				7.88		3.12		1.19	1.12
gi|16130530				4.76					0.84
gi|16128124				5.38
gi|16128205				7.44
gi|16128555				0.88		0.64
gi|16128879				8.39		6.21
gi|16129071				0.09	0.35
gi|16129262				1.41		0.67
gi|16129672				3.93
gi|16129760				3.12
gi|16129770				0.96
gi|16130211				6.39
gi|16130576				2.32
gi|16130713				1.9
gi|16130793				4.66		2.52
gi|16131062				9.86			1.36
gi|16131067				0.13	0.68
gi|16131073				2.51	0.63	1.9	1.28		0.91
gi|16131122				1.22		3.08		0.97	1.32
gi|16131190				7.54
gi|16131231				3.73		2.12			0.88
gi|16131372				7.49					1.48
gi|16131421				9.05	7.12	2.99		1.64	1.27
gi|16131484				0.09
gi|16131519				0.74
gi|16131654				1.74	6.25	3.3	1.95	1.52
gi|16131661				5.71		3.1		0.98
gi|16131727				5.62		3.6		1.84
gi|16131963				2.65
gi|16128104				6.16
gi|16128244				2.55
gi|16129766				0.12		1.52
gi|16129886				7.09				1.57	1.06
gi|16130155				9.72
gi|16130197				5.64		1.91
gi|16130456				0.27		0.05
gi|16130964				0.14
gi|16131417				4.32			1.52	1.54
gi|16131505				1.54
gi|16131498				1.54
gi|16128138					1.01		2.27
gi|16128838					1.96		1.08	1.27
gi|16132057					4.34	0.38		1.81	1.31
gi|16130596					3.33	3.01		0.85
gi|16130510					0.91	3.24		1.28	1.2
gi|16128224					1		2.12	1.24	2
gi|16128476					0.13	5.08	0.86	1.84	0.15
gi|16128912					2.62	1.74	1.39	0.89
gi|16129079					0.73
gi|16129813					1.32
gi|16130142					3.12
gi|16130251					2.08	2.46	1.94	1.9	1.01
gi|16130277					2.7
gi|16130515					3.12	1.56			0.89
gi|16128583					8.09		2.63	1.65	2.89
gi|16128713					1.29		1.81
gi|16128898					2.35	1.94	0.91
gi|16129155					0.91	5.59	1.46	1.58	1.16
gi|16129174					4.97	3.38		1.82	1.26
gi|16129720					1.35
gi|16130528					2.3
gi|16130982					5.2
gi|16131423					3.8	4.42	2.13		0.78
gi|16131480					5.29				1.23
gi|16131557					3.16
gi|16128149					8.3
gi|16128276					34.46
gi|16128286					10.81
gi|16128354					2.54
gi|16128872					2.46	1.62		1.14	0.82
gi|16129067					1.41
gi|16129091					0.73		2.41
gi|16129408					0.19		2.8
gi|16129455					5.44
gi|16129562					2.55			0.59
gi|16130093					5.44
gi|16130056					5.44				0.91
gi|16130274					4.01
gi|16130281					6.96	0.93
gi|16130302					6.96
gi|16130317					6.96
gi|16130783					2.04
gi|16130766					2.04
gi|16130928					1.29
gi|16131555					6.01
gi|16131471					6.01
gi|16131657					6.3	4.61	2.34
gi|16131679					2.87			1.04	0.8
gi|16131808					1.62
gi|16131875					1.32
gi|16131932					1.25
gi|16131990					1.23
gi|16132036					2.82
gi|16132258					1.17				3.14
gi|16132264					10.18
gi|16130124						2.94	2.04	1.17	2.47
gi|16130426						1.73			1.43
gi|16129089						2.53	1.37	2.28
gi|16130948						3.72	2.31	0.89	1.21
gi|16128461						2.42		0.83	1.01
gi|16130733						2.94		1.49	1.51
gi|16130803						3.88		1.89	1.67
gi|16130847						2.6	1.22		0.56
gi|16131335						2.06		0.91
gi|16131574						2.75		1.68	1.39
gi|16130238						3.25			1.64
gi|16130501						3.75
gi|16131895						1.63		0.6
gi|16132207						2.76
gi|16128859						4.1
gi|16128889						0.62	0.44		1.2
gi|16130404						3.59
gi|16130419						3.01	1.72	1.09
gi|16130425						2.22
gi|16131057						2.49			1
gi|16132055						3.57			1.19
gi|16132199						2.73	3.56
gi|16128000						3.67		1.89	1.2
gi|16128081						1.96
gi|16128085						2.48
gi|16128087						2.36
gi|16128141						0.65			1.21
gi|16128225						3.41		1.01
gi|16128227						3.86
gi|16128429						2.66			1.32
gi|16128877						3.33
gi|16129241						3.59
gi|16129282						2.36			1.27
gi|16129438						2.89			1.04
gi|16129603						1.69
gi|16129797						1.33
gi|16130298						0.26			1.07
gi|16130723						2.86
gi|16130852						1.5
gi|16130922						1.12
gi|16130961						2.24
gi|16131085						2.62	1.78	1.12	1.56
gi|16131196						0.39		1.42
gi|16131224						1.87
gi|16131331						6.98
gi|16131708						1.33			0.5
gi|16131755						0.83	0.7
gi|16132042						1.87
gi|16132209						1.57
gi|16132231						1.53	0.72		0.45
gi|16132263						2.92	2.18
gi|16128164						2.31
gi|16128330						2.34		1.4
gi|16128624						1.8	1.7	1.01
gi|16128890						3.03
gi|16128940						1.81
gi|16128916						1.81	5.84		0.86
gi|16129027						1.99			1.27
gi|16129033						3.52		1.36	0.98
gi|16129295						1.95
gi|16129383						1.96		1.02	0.87
gi|16129571						0.01
gi|16129699						2.81
gi|16129871						1.17
gi|16129921						1.88		0.71
gi|16130121						3.38
gi|16130201						5.15			2.45
gi|16130327						0.93
gi|16130375						1.88
gi|16130589						1.4
gi|16130862						2.37
gi|16131083						14.08	4.49	1.3	5.57
gi|16131234						4.2
gi|16131435						1.66
gi|16131989						0.74
gi|16131864						0.74
gi|16132227						2.86
gi|16128513							2.19	1.38
gi|16130437							1.81	1.45	0.84
gi|16131664							2.31
gi|16129376							2.87	0.61	0.97
gi|16129734							1.77
gi|16129619							1.77
gi|16128070							3.32
gi|16130533							3.55		1.05
gi|16131042							1.1
gi|16131647							2.81	1.31	1.13
gi|16132048							2.1
gi|16132206							2.04		0.86
gi|16128685							3.77	0.32
gi|16129824							1.66
gi|16130531							1.7	1.5
gi|16130906							2.66	2.13
gi|16131136							0.88
gi|16131378							2.47
gi|16132212							0.82
gi|16128079							1.13		1.36
gi|16128139							0.18
gi|16128353							2.06	0.89
gi|16128366							2.28		2.3
gi|16128554							1.03
gi|16128629							1.18
gi|16128967							5.84
gi|16128962							5.84
gi|16129263							0.52
gi|16129325							2.28
gi|16129462							2.22
gi|16129553							0.79
gi|16129659							1.65
gi|16129713							1.4	1.81
gi|16129776							0.76
gi|16130088							3.64
gi|16130279							1.09
gi|16130722							2.14		1.29
gi|16131163							2.26
gi|16131734							0.7
gi|16131833							1.55
gi|16131925							2.98
gi|16132060							1.12
gi|16132157							0.66
gi|16132089							0.66
gi|16132177							1.8
gi|16132171								2.73	1.8
gi|16128569								0.09	0.05
gi|16131821								0.36
gi|16128777								5.09
gi|16130311								0.86
gi|16131510								1.71
gi|16129087								1.67
gi|16129337								0.45
gi|16129499								1.52
gi|16129893								1.82
gi|16129917								0.34
gi|16130246								1.14
gi|16130876								2.03
gi|16131634								2.4	3.76
gi|16128077								1
gi|16128106								0.72
gi|16128209								0.94
gi|16128256								3.83
gi|16128329								1.41
gi|16128401								1.22	0.69
gi|16128576								1.01
gi|16128831								0.91
gi|16128939								6.83
gi|16129064								3.34
gi|16129545								0.73
gi|16129888								11.08
gi|16129892								1.72
gi|16129991								0.66
gi|16130143								0.91
gi|16130216								1.89
gi|16130412								0.8
gi|16130665								1.51
gi|16130785								1.1
gi|16130873								1.2
gi|16130904								0.56
gi|16130977								1.11
gi|16131003								1.57
gi|16131030								1.07
gi|16131048								1.56
gi|16131386								4.64
gi|16131692								1.84
gi|16131792								4.7
gi|16131984								1.77
gi|16132062								1.73
gi|16128589									1.47
gi|16129686									4.82
gi|16130888									1.75
gi|16131655									1.33
gi|16128839									6.87
gi|16129161									0.95
gi|16129667									23.56
gi|16131462									1.84
gi|16130926									0.61
gi|16131689									1.58
gi|16128019									1.46
gi|16128176									2
gi|16128453									1.02
gi|16128902									0.95
gi|16128931									7.92
gi|16129137									2.35
gi|16129411									0.05
gi|16129638									0.63
gi|16130004									1.04
gi|16130070									0.91
gi|16131306									2.52
gi|16131979									0.64
gi|16132144									1.6
gi|16132205									0.91
gi|16132254									0.95
gi|16128063									3.59
gi|16128174									0.7
gi|16128464									0.85
gi|16128633									2.89
gi|16128800									9.99
gi|16129022									1.11
gi|16129111									20.17
gi|16129228									1.46
gi|16129284									1.56
gi|16129730									1.33
gi|16129761									0.66
gi|16129952									1.16
gi|16130115									10.64
gi|16130235									1.28
gi|16130265									1.26
gi|16130346									0.42
gi|16130608									0.87
gi|16130817									1.05
gi|16131772									3.25
gi|16131830									1.17

## Sheet: BL21 Oxidative Stress
Gi	5min	8min	12min	15min	20min	30min	45min	60min
gi|16131218	15.63	8.78	14.77	8.8	6.08	7.95	17.8	6.14
gi|16131219	15.42	6.2	98.98	2.08	26.79	100.98	34.44	8.16
gi|16132025	45.19	6.53	12.75		6.09		61.72	10.17
gi|16128588	127.04	152.62	39.81	45.5	14.84	3.46	11.31	3.75
gi|16130342	54.18	3.89	21.15	23.69	7.17	29.35	16.02	6.02
gi|16130686	6.25	18.71	28.04	67.97	4.66	30.25	11.28	4.12
gi|16129733	26.45	28.3	21.82	3.46	4.08	71.41	16.28	6.03
gi|16130123	17.04	0.2	0.34				5.61	4.78
gi|16131815	27.42	17.63	17.77	4.97	44.54	31.13	53.05	14.2
gi|16131177	26.55		23.69		3.63	177.26	27.58	11.28
gi|16130340	27.95	3.94	7	0.97	16.64	21.75	7.18	3.65
gi|16131836	31.43	3.17	5.09	2.65	5.02	59.16	8.6	3.93
gi|16131678	24.18	17.03	63.14	153.47	9.51	42.4	28.8	6.92
gi|16128874	111.55	3.23	5.76	18.58		25.7	8.73	4.16
gi|16131602	24.44	17.69	20.83	5.38		12.31	20.29	6.75
gi|16131187	2.02	23.63	134.34	8.12	3.33	210.01	70.61	17.36
gi|16128107	15.42	4.95	5.24	151.42	12.36	27.62	18.08	13.43
gi|16131968		18.14	6.26	50.88	9.72	9.56	75.94	11.55
gi|16129411	109.91	8.66	82.47	51.91	9.17	29.25	15.02	6.24
gi|16131220	23.38	66.89	35.82	82.97	10.13	171.65	55.14	14.25
gi|16128008	23.7	32.91	7.51		4.56	3.94	19.94	7.1
gi|16131126	18.17	33.72	55.21	30.23	1.32	37.08	13.61	5.13
gi|16131830	35.45		11.22	292.45		43.44	10.35	4.93
gi|16129285	1.92	23.61		1.88	76.25	18.88	6.21	3.04
gi|16131173	86.82		15.55	64.74	5.33	244.62	41.01	10.9
gi|16129633	6.42	33.8	12.85		0.29	48.13	11.39	4.59
gi|16131056	15.26	5.6	15.33	4.86	7.71	6.44	7.61	5.3
gi|16131600	14.55	4.43	31.44	9.65	6.62	1.47	30.92	8.77
gi|16130792	15.81		2.79	0.53		3.36	14.28	6.35
gi|16128878	17.37	7.61	1.74	3.73	4.16	59.56	21.22	7.01
gi|16128421	9.74	3.03	7.92	8.42	6.46	25.07	19.82	6.57
gi|16130814	68.18	4.05	2.41		4.94	22.15	9.88	5.57
gi|16128159	169.37	15.18	9.87	122.28	2.27	24.55	16.99	7.39
gi|16129221	15.53	9.57	3.78		3.68		7.4	1.98
gi|16128163	16.87	9.22	7.82	9.02	3.35	75.39	35.27	8.98
gi|16130827	12.14	9.13	8.65	36.45	55.6	36.28	13.02	4.68
gi|16128870	17.97	10.25	1.45	7.06	4.61	33.46	7.8	2.63
gi|16131175	107.78	62.05	14.83	187.28	38.45	28.7	52.34	11.52
gi|16128723	17	9.02	20.34	219.46		62.32	16.55	6.11
gi|16128638	13.02	12.26	12.08	14.82		22.81	22.15	7.56
gi|16128457	13.74	6.06		8.82	0.91	1.18		11.21
gi|16130443	23.09	120.29			3.86	113.75		6.48
gi|16128002	9.8	14.11	10.42	50.05	5.21	36.32	11.59	4.93
gi|16129099	8.63	2.08	13.29	44.22		22.42	8.41	4.04
gi|16131198	87.35		32.93		12.53		93.5	11.78
gi|16131632	19.17	8.52	0.91	3.97	0.11	28.91	16.46	15.09
gi|16131710	11.48	13.07	15.62	10.38	11.16	24.64	185.16	54.81
gi|16131182	22.47	15.4	9.2	5.19	7.58		7.96	12.49
gi|16131188	61.07	1.08	62.33			167.28		6.22
gi|16129614	33.15	73.2	4.39	4.4	10.74			103.51
gi|16129632	14.86	12.24	5.95	1.04	7.86	20.84	7.42	3.56
gi|16129249	10.1	33.16	11.71	3.85		80.19	14.99	6.52
gi|16131181	36.64	0.98					1.4	10.95
gi|16128109		7.75		29.09	1.51	28.51	14.24	7.36
gi|16128924	6.16	7.81	14.55	148.59		18.17	8.22	5.34
gi|16131814	58.24	51.89	38.46	51.8		9.65	46.87	9.47
gi|16130091	22.78	19.18	38.61				6.88	2.44
gi|16129669	15.28	3.42	12.15	6.15	2.87	12.36	14.63	5.72
gi|16128722	21.5	33.99	4.26	30.26		17.17	9.09	4.3
gi|16131184	34.21	3.41	5.66	19.08		50.9	43.43	14.62
gi|16131180	3.96	3.31		0.68	3.83	117.48		8.26
gi|16128896	14.44	33.26	34.17	24.46	6.1	17.73	9.45	5.04
gi|16131817	12.63	11.32	14.9	2.12	4.07	48.84	9.74	3.54
gi|16131967	17.12	3.54				386.59	38.38	10.8
gi|16129777	24.06		28.26				30.21	4.67
gi|16131955	17.78	1.57	1.4		6.14	1.23	12.6	25.53
gi|16131200	25.17	42.38		0.98	4.61	26.61	88.76	6.13
gi|16131416	6.74	3.91	3.09	7.3		23.52	11.03	6.89
gi|16128108	2.25	7.06	28.81	33.32	3.41	32.41	15.06	8.66
gi|16130527	67.58	59.07	14.27	80.71	2.48	83.75	75.61	11.79
gi|16131637	36.51	320.41	24.3			34.54	6.33	5.54
gi|16130350	16.01	5.23	6.98	31.58		12.05	4.7	3.4
gi|16131824	16.15	2.76	13.55		7.2	9.23	3.37	1.4
gi|16128171	157.34		14.3	6.91		46.91	11.54	5
gi|16130093	30.48	13.69	8.27	8.25	10.67	86.07	12.61	8.48
gi|16129819	0.81	7.98	7.86		1.44	23.28	14.22	6.08
gi|16128567	14.64	2.84	4.29	15.13	7.74	48.48	20.01	8
gi|16128017	22.38	9.7					22.72	2.87
gi|16131370	13.14				2.91	2.47	13.74	5.4
gi|16128187	12.1	6.97	4.67	1.15	2.29	19.5	13.84	6.47
gi|16129612	12.7	2.1	4.07				6.62	1.86
gi|16129803	23.03						13.25	4.19
gi|16131880	1.13	1.22	6.89	1.14	10		16.63	5.55
gi|16131794	7.14	3.26	4.35	18.31	2.14	23.53	11.06	6.15
gi|16131196	68.94	28.88	4.69	74.95		2.39	80.59	15.05
gi|16131174	5.17	17.41	1.94			0.18	24.16	7.31
gi|16131629	23.94	30.16	59.73		11.08	84.7	17.59	8.86
gi|16132080	8.63	2.72	13.83	1.97	1.36	13.28	14.05	5.32
gi|16129970	8.19	3.2				52.21	10.98	4.57
gi|16130836	31.46	3.25	3		8.92	2.4	20.18	9.85
gi|16130232	16.65	3.65	2.32	4.33	4.69	32.7	12.44	8.49
gi|16128879	17.07	1.6	1.52				8.08	2.52
gi|16130433	2.95	1.75	1.34	10.08	43.58	48.74	7.6	4.24
gi|16131818	5.3	5.97	19.46	4.09	1.19	40.77	9.19	3.78
gi|16131628	4.87	50.95	9.37	145.28	0.78	103.02	28.94	9.63
gi|16128223	0.17		4.5	2.57	0.63	31.51	14.44	6.31
gi|16131850	14.91	2.02	10.37	4.79		11.9	40.22	10.87
gi|16131999		24.77	23.59	10.39		559.54	20.85	5.36
gi|16129247	0.36		2.86	7.91	5.04		13.32	5.77
gi|16130482	12.2	4.38	3.03	61.75	1.9	43.53	10.52	5.56
gi|16130513	0.78	3.48	2.83	0.95	7.39	55.9	12.86	8.89
gi|16131812	29.13	2.64		1.91	6.2	52.61	15.14	5.52
gi|16130244	19.24	2.95	1.58	3.98	1.42	19.27	11.45	4.4
gi|16128111	17.66	11.71	3.12	5.66	4.71	17.91	3.06	1.29
gi|16131508	74.83	7.22				119.4	18.39	11.99
gi|16128897	5.37	35.21	7.65	59.18		22.78	13.6	5.14
gi|16131121	48.17	58.45	7.72		12.48	199.23	60.84
gi|16128027	9.01	6.09	0.85	19.62	4.24	20.56	4.84	2.35
gi|16131293	23.15	2.32	0.59	2.83	2.75		9.79	16.25
gi|16128119	9.28			18.39		39.48	12.51	5.31
gi|16128162	3.11	9.57	4.36	1.56	1.39	14.75	16.33	9.02
gi|16129202	13.26	4.1	12.96	18.57	5.05	56.45	13.11	4.07
gi|16131060	4.31	3.82	3.84	24.81	5.95	20.71	17.04	6.79
gi|16131120	9.41	17.58	3.33				22.85	10.4
gi|16132024	10.41	7.2	11.72					6.33
gi|16128996	0.84	0.66	2.95			6.84	7.77	5.87
gi|16130166	2.29	17.59	2.93	0.73	1.85	20.53	15.99	3.92
gi|16130432	13.02	22.63	6.79	3.06	6.5		6.56	4.07
gi|16131166	0.12	0.01	0.53	0.56	2.14	14.74	4.02	2.52
gi|16129948	16.47	11.25				27.91	7.7	2.78
gi|16131816	60.51	5.35		0.8			52.21	7.14
gi|16128625	23.5	20.34	17.43	59.8	3.58	17.56	13.35	5.1
gi|16128126	2.35	3.67					8.3	4.18
gi|16129674	16.83			1.34	5.47	17.88	8.78	3.41
gi|16130583	43.73	16.3		15.54			7.16	4.25
gi|16128165	24	8.6		4.41	9.27	24.34	11.11	6.01
gi|16128509	26.16	3.21	3.83	39.56		76.95	11.16
gi|16129734	22.59		14.04	14.37	1.39	29.02	7.68	4.03
gi|16130423	32.28		6.55		5.82		18.19	4.86
gi|16131082	27.09				4.74	15.13	9.64	3.25
gi|16131102	14.54	3.67	5.36	2.82	8.58	18.11	5.57	2.61
gi|16128578	11.12	0.88					20.78	7.87
gi|16128704	0.68	42.58	38.64	2.68	4.98	42.03	27.02	6.61
gi|16132048	14.39	11.51		2.05	12.19		18.95	7.39
gi|16129807	37.1		32.18	1.25	0.31	8.11	7.42	5.49
gi|16131821	1.19			2.43			3.72	3.96
gi|16129086	3.81	1.04	4.49			86.92	14.03	6.19
gi|16130805	2.78	6.47	3.88	6.76	2.55	12.72	3	5.34
gi|16131774	27.79	5.32					71.39	8.52
gi|16130599	34.08		3.25	5.39	2.15	6.33	8.37	2.21
gi|16130403	33.72		5.08			35.72	8.31	4.93
gi|16131813	11.28	11.89	22.33	7.12		6.14	20.03	13.67
gi|16131236	13.94		1.1	24.39		0.49	12.67	5.06
gi|16129784	10.8	1.85	1.86	3.56	4.29	0.87	9.5	4.04
gi|16130405	2.21		14.39			20.56	5.79	3.51
gi|16128020	9.12	3.66	3.84	18.09	1.98		10.76	6.07
gi|16131226	2.25	10.88	4	31.64		51.75	16.49	8.33
gi|16131885	29.24		13.52		3.74	20.7	8.5	3.29
gi|16131430	0.34	7.06		3.86	3.84	38.04	21.27	8.15
gi|16131597	15.76	11.17	9.55	12.83	1.12	145.2	11.95	4.54
gi|16128921	30.35		5.37	1.5	1.09	43.96	9.42	4.23
gi|16130839	6.8	7.23		0.37	9.28	38.74	8.82	5.93
gi|16131490	0.24		6.73	4.08		34.34	12.99	6.1
gi|16128161	12.78	2.54		2.78		6.19	11.63	7.22
gi|16128569	6.08	9.36	7.89	2.9		9.89	17.1	6.47
gi|16128855	2.6	1.96	1.79	6.35		9.21	7.88	4.04
gi|16129694	1.72			7.04		10.69	10.65	4.85
gi|16130238	21.61		9.07					2.84
gi|16130604	0.08	1.33	3.43	0.66	3.52	2.25	13.26	8.16
gi|16131601	9.47	2.11	23.58			4.06	26.22	8.4
gi|16131680	12.65	2.98	2.5				11.99	7.36
gi|16130388	4.43	2.48	7.15		5.47	1.78	12.87	8.77
gi|16128422	102.11	0.37			1.54		16.54	6.43
gi|16128703	16.72		15.5	7.74		25.35	11.72	6.78
gi|16129054	8.1	4.79		6.98			13.05	4.93
gi|16131711	15.15	3.87	2.72	0.51	8.37		15.07	5.54
gi|16128659	0.75	4.41	5.89	0.2		8.65	4.83	9.63
gi|16129204	3.36	6.09		1.55	1.22	2.27	10.65	5.28
gi|16130848	1.41	2.18	1.13	3.98		1.03	4.56	5.73
gi|16128701	5.51	3.88	2.2	9.49	2.28	13.08	12.68	6.02
gi|16131144	6.51	1.12	15.21	0.41		1.08	27.55	7.86
gi|16131191	124.56			108.72			128.34	9.82
gi|16131755	5.38		0.39	4.18		1.32	8.09	5.95
gi|16128026	8.67	8.48		6.31		18.03	3.72	2.73
gi|16128047	11.82	11.51	8.43				12.92	5.41
gi|16130231	7.06	3.41		3.45	7.24	48.27	47.68	10.56
gi|16130843	2.73	3.61		2.35			9.19	6
gi|16131624	20.57	12.19					14.99
gi|16128067	14.12	3.77	8.98				10.82	3.98
gi|16130800	4.85			0.5			10.66	4.92
gi|16131520	1.19	0.61	7.42		8.87		5.09	2.49
gi|16129178	14.22	5.87			2.97		7.37	4.36
gi|16130522	14.42	6.08	4.67	14.34		3.19	9.82	2.75
gi|16131238	3.05				1.57	11.12	5.64	3.69
gi|16131754	12.04	1.01		1.03		18.86	9.69	3.23
gi|16127996	0.04	17.08	4.11	1.16		0.71	3.68	4.28
gi|16128419	9.27	3.4			4.14	44.45	13.83
gi|16128170	2.07	4.86	10.77	8.57	4.04	2.59	2.61	7.77
gi|16128663	25.17				1.03	4.44	11.8
gi|16128154	0.89	3.44		6.49			7.08	3.51
gi|16128453	18.34				4.75		13.13	4.29
gi|16130167	2.2	4.21					5.64	4.48
gi|16128860	0.1	9.97	1.78			29.66	10.32	5.45
gi|16129065	0.42	26.35		0.67	3.55		11.95	3.29
gi|16130860	7.99			120.97		92.13		3.89
gi|16129052	49.12	0.23				0.16	23.66	10.12
gi|16129498	2.44			28.33			15.59	5.21
gi|16130454	24.38		6.13				5.1
gi|16131119	1.8	7.12	7.1	4.85			9.08	5.25
gi|16131290	7.52	137.55	3.2	31.37	1.27		7.65	1.94
gi|16131798	1.06	1.27	11.08				13.76	6.21
gi|16129058	3.67	19.28	1.11	0.8	2.69		14.8	9.01
gi|16129964	31.11	0.59					14.55	6.44
gi|16128476	0.16	4.58		1.28		1.37		5.07
gi|16128899	12.1	1.31	6.72	13.01	2.25	77.6	9.81	4.38
gi|16129093	2	10.17	11.76		0.58	4.8	9.23	3.02
gi|16131066	3.27		0.42	0.75			8.57	7.08
gi|16131424	5.32						10.18	3.05
gi|16131507	22.76	5.45					24.85	6.16
gi|16128178	1.64	1.68	3.42	4.79		4.95	11.58	7.03
gi|16128465	0.05	0.23			1.09	1.9	2.73	2.06
gi|16129022	26.87		0.72	8.55			8.54	3.94
gi|16129917	5.23	8.55		0.46			3.91	6.69
gi|16129966	0.45	1.17		8.52			16.77	5.46
gi|16130863	31.5		2.87				3.46	2.58
gi|16128208	1.41	4.58			0.63		9.46	4.79
gi|16128561	10.99	69.1	3.78		6.16			5.87
gi|16128782	36.09	17.54	3.24		7.19	7.33	3.93	1.51
gi|16128831	0.8			41.23			11.54	3.79
gi|16130258	7.91	7.35	3.32	3.14		12.56	2.99	1.8
gi|16130402	1.87		1.96	0.81			7.02	4.56
gi|16131292	17.69		2.66				12.4	15.01
gi|16131372	0.23	5.11		5.07			8.92	5.31
gi|16131519	20.26	6.43		13.79			15.92	6.06
gi|16128354	2.41			0.85		5.19	14.06	6.22
gi|16128589	7.04	14.19	8.41			4.72	2.99	3.36
gi|16129593	5.6	10.54	10.11	1.91			8.68	3.25
gi|16129715	0.91	53.21	3.88	46.55		16.67	17.69	6.53
gi|16130121	23.52	4.78		3.01			14.13	3.99
gi|16130320	32.49							8.34
gi|16130925	7.81							3.81
gi|16131063	23.97	2.11		1.57	4	7.63	8.63	5.12
gi|16131274	16.31	5.37					7.12	3.09
gi|16128118	9.82	1.33	1.46				6.93	5.04
gi|16128768	2.21	1.4		9.21		12.54	5.24	3.16
gi|16128932						24.84	5.04
gi|16129658	0.92	1.2	3.99	0.13	5.89		5	3.39
gi|16130446	8.2							5.64
gi|16130802	10.11						9.19	3.1
gi|16128664	0.01		9.29		1.88	1.16	8.43	4.25
gi|16129681	0.39		6.39	0.01			6.81	3.82
gi|16130190	9.84	4.82		0.12	1.43	10.75	3.44	3.1
gi|16130861	12.89			0.24				5.41
gi|16131599	13.66	0.93	12.55				22.72	8.28
gi|16128048	0.47	1.05		0.2	2.01		12.23
gi|16129341	1.77		2.92	1.05				2
gi|16129963	8.06					23.43	15.42	5.66
gi|16131701	14.25	0.03	0.72	0.01			6.28	4.6
gi|16131841	1.86	2.27					15.38	7.24
gi|16131228	1.06	2.03	7.44			18.99	10.09	3.8
gi|16131510	0.73			1.1		0.81		2.42
gi|16132208	69.81	1.26	12.57		5.24	1.71	12.02	3.37
gi|16129703	14.43		2.98				2.7	4.88
gi|16130341	45.26		3.86	4.62	3.61		20.77	8.52
gi|16130659	1.97		21.79	1.89		13.88	7.18	4.88
gi|16131094	6.72	4.69	14.7	0.47		11.76
gi|16131822	0.78	1.24	2.12			18.95	5.51	2.49
gi|16131844	3.36		2.45					5.35
gi|16128376	11.22							1.24
gi|16128750	0.64	6.08		0.16		21.65	9.35	2.04
gi|16129636	1.73	5.86		3.92		13.44	9.23	3.13
gi|16129686	0.33	0.44	2.64	0.83				19.17
gi|16129965	4.08		2.88					6.88
gi|16130169	1.65	24.95	2.98		2.31		15.74	5.65
gi|16130489	6.64		4.87	6.34			10.22	7.85
gi|16131423	1.93			5.88		4.59
gi|16128780	5.22		1.5	1.31	0.61	0.39	0.43
gi|16128997	0.95	0.54			5.84		13.21	3.06
gi|16129034	4.78					2.02	0.6
gi|16129155	1.06	1.38	8.13	1.15		4.3	10.7	3.71
gi|16130029	6.58
gi|16130071	2.17	1.6				4.5	6.2	8.56
gi|16130254	1.45		1.19				5.26	3.99
gi|16130425	45.52		14.67				13.49	4.89
gi|16131167	0.18			8.08		1.86	9.13	5.08
gi|16132036	0.3		10.54				10.53	2.87
gi|16132149	3.16			3.02		0.84	2.67	8.18
gi|16128066	1.85	4.97		6.61	2.59	0.58		3.68
gi|16129030	5.82						6.9	4.53
gi|16129063	5.96						1.49	2.76
gi|16129094	5.19	6.43	5.81			9.72	9.87	5.13
gi|16130424	1.27	11.8		15.81		22.07	3.13	5
gi|16131135	3.08		0.29		1.35		0.71	4.84
gi|16131515	0.09	2.86		10.15		52.09	2.85	3.79
gi|16132263	4.75		9.5				9.72	6.64
gi|16128858	8.53
gi|16129616	0.05	16.92		11.32		0.77	2.59	3.64
gi|16130518	17.16
gi|16130742	12.96	1.1			0.04	3.41		1.94
gi|16130849	7.12			4.49		16.06	4.75	3.54
gi|16131103	0.45	17.61	8.69	27.18			6.05	2.18
gi|16131603	7.31	1.79		0.3	4	70.7	25.46	9.18
gi|16131762	2.58			1.47	1.28	3.04	1.65	1.07
gi|16132189	0.99						10.89	3.96
gi|16128392	0.12						14.8	6.07
gi|16128914	1.3		0.94				15.29	6.4
gi|16129138	1.84		4.46	2.81		0.67	13.76	4.42
gi|16130669	1.6						7.64	3.11
gi|16130689	1.29	1.81
gi|16130847	0.06		2.4				3.87	2.92
gi|16132066	12.74	0.94		0.27		2	0.41	0.38
gi|16128096	1.02						13.11
gi|16128102	3.17		1.94				3.19	4.68
gi|16128143	2.01		5.01	1.78	6.54	10.01	8.99	7.68
gi|16128209	1.87							3.61
gi|16128372	9.94				1.14	18.72
gi|16128894	1.68						5.37	3.17
gi|16129031	0.52							4.48
gi|16129927	4.19
gi|16130019	0.62	1.33						3.02
gi|16130392	5.11					0.39	5.11	2.37
gi|16130948	1.61	0.87	18.2	3.27		0.16	10.11	3.84
gi|16131263	0.35	1.48						5.12
gi|16131264	13.14		15.62				16.25	4.03
gi|16131609	11.95	0.51						4.44
gi|16128003	3.43			0.22			1.97	1.21
gi|16128339	4.09					2.39		3.75
gi|16128396	27.77	3.47					24.3	3.72
gi|16128654	2.05		1.34					6.41
gi|16129814	4.4	1.66					3.29	1.56
gi|16130222	4.13	0.34
gi|16130344	3.53	0.78						4.22
gi|16131048	3.29					11.84	6.56
gi|16131116	4.71							5.16
gi|16131149	25.83					122.85	9.38
gi|16131235	28.41	3.12		18.2			16.89
gi|16132209	5.51	1.51			2.67			3.3
gi|16128540	0.04	3.82
gi|16128832	10.74			0.36				6.43
gi|16129265	3.86		4.6				1.95	4.04
gi|16129979	43.25						25.8	7.67
gi|16130218	0.05	5.84		8.91	2.12		8.85	4.07
gi|16130807	0.64		3.53			0.38		6.87
gi|16132041	2.84	15.66						3.15
gi|16132061	2.95
gi|16132170	0.27
gi|16128065	10.6				1.53		6.1	8.73
gi|16128342	4.29	1.7	37.07				7.19
gi|16128624	0.09		0.56		3.04	0.82		7.33
gi|16129224	0.12	6.31	0.86				5.44	1.85
gi|16129373	3.62		0.16	0.95				3.64
gi|16129383	3.82	1.1						6.08
gi|16129608	3.08			1.57			5.84	2.62
gi|16130930	3.86						12.22	5.66
gi|16131671	4.9
gi|16131699	0.36						10.03
gi|16131706	3.49							3.99
gi|16131869	1.28						13.93
gi|16131962	0.87
gi|16128391	0.02							3.09
gi|16128594	2.61			0.75				4.14
gi|16128778	0.07	7.23
gi|16128930	0.96	1.49	0.22
gi|16129457	0.04				4.34		0.11
gi|16130453	5.03	0.98	7.26			14.82	1.17	43.31
gi|16130817	9			4.39
gi|16131090	5.04							0.03
gi|16131139	0.37	0.19		3.43	1.93		5.78	7.5
gi|16131827	4.03	41.83		3.78		7.54		4.34
gi|16131872	0.05	0.12	0.46
gi|16128615	0.47		0.42	3.35		0.48	13.59	7.65
gi|16129484	0.14							8.83
gi|16130032	0.99	0.66		31.59		1.02
gi|16130051	0.64
gi|16130421	1.47
gi|16130606	11.02			7.97		1.84	0.62	4.31
gi|16130950	3.2					40.13		6.22
gi|16131081	3.03					0.41
gi|16131141	8.69	4.47					11.18	4.45
gi|16131231	0.11				0.3	0.88		6.57
gi|16131285	0.1						6.05	3.86
gi|16131331	6.88	2.6					5.71
gi|16131605	33.59					234.42	41.09	8.28
gi|16131808	0.04							3.14
gi|16128001	1.55
gi|16128192	0.12	3.06
gi|16129390	0.71						7.36	3.12
gi|16129438	6.03		1.04
gi|16130234	3.53						5.88
gi|16130494	7.42		2.86		2.94			6.17
gi|16130534	0.03
gi|16131246	0.03							3.03
gi|16131297	0.26
gi|16131567	0.86	21.35		1.01	1.76		13.12	3.76
gi|16131989	22.29
gi|16128104	10.46						3.93	4.61
gi|16128217	3.02
gi|16128315	0.31
gi|16128734	0.07
gi|16128710	0.07
gi|16128915	0.56
gi|16129018	0.65
gi|16129126	0.45
gi|16129160	1.71
gi|16129529	1.07
gi|16129522	1.07					2.63
gi|16129546	0.12
gi|16129824	2.03		6.26				4.04	4.7
gi|16130009	7.51
gi|16130034	0.29
gi|16130663	1.05
gi|16130855	28.84							7.59
gi|16131358	0.3		0.67		0.49
gi|16131941	7.42
gi|16132060	0.06
gi|16131194		19.52			5.28			11.95
gi|16130530		8.66	24.06				58.39	8.71
gi|16130476		17.27	12.23		14.24	52.32	9.97	5
gi|16131195		12.89		38.3			82.28	16.21
gi|16128190		36.81	35.92	61.73	71.1	24.34	9.61	4.22
gi|16131639		0.75	3.42	2.3	1.77	4.29	16.49	4.74
gi|16131192		4.74			57.33			8.35
gi|16131075		16.97		0.71			31.79	3.34
gi|16131185		5.6	2.72	0.91	5.82	87.72		10.51
gi|16129916		16.82	12.69	90.44			40.78	10.62
gi|16128716		53.05		0.58	26.09	44.85	12.66
gi|16130826		60.81	3.79			33.35	14.51	5.16
gi|16131199		16.63	11.85	4.06				15.4
gi|16131332		16.4	122.72	17.89		65.68	9.82	4.38
gi|16131076		2.94				288.51	42.6	10.71
gi|16129170		5.63		11.77		14.95	11.12	5.12
gi|16128895		32.94	8.34	127.8	0.43	31.29	9.32	3.73
gi|16128982		4.37	12.69	3.41		32.38	8.62	3.32
gi|16128400		3.52		52.7	3.12	45.37	10.2	5.03
gi|16131823		6.85	18.74	3.63	1.38	13.68	9.32	3.97
gi|16128577		5.75				81.87	13.8	7.6
gi|16128779		28.9	23.14	10.4	17.53	40.65	22.2	10.09
gi|16131994		57.54	2.71	45.96		50.52		6.89
gi|16130033		8.63		17.5		2.9	3.58	14.3
gi|16130478		1.7	13.81	0.87		37.72	9.05	4.19
gi|16131851		9.44		9.48	1.97	25.09	9.87	7.3
gi|16130401		2.83		62.92		1.58	5.81	3
gi|16131189		1.03	8.91	21.15		53.92	43	10.98
gi|16131757		41.19	12.24	2.29	4.28	47.88	8.76	4.45
gi|16129056		8.84		1.29		1.34	10.73	6.56
gi|16129672		46.13				228.52		15.94
gi|16127998		4.1	2.38	45.8		15.22	11.48	5.96
gi|16130187		47.82	5.36		4.21	92.55	14.66	5.95
gi|16131604		16.5			17.57	55.16	19.15
gi|16131193		169.36		1.72		30.42	3.69	13.29
gi|16130671		5.37	4.45		9.5	14.6	7.15	3.82
gi|16130931		25.97	3.4	0.54		5.27	5.89	4.44
gi|16130052		30.04			0.33		13.55	6.11
gi|16131307		38.57		13.62		33.83	9.54	5.31
gi|16131780		4.5	4.28	2.37	2.38	2.35	1.86	1.28
gi|16128579		1.86				0.37	36.02	11.67
gi|16130658		10.02	0.69		3.6	11.83	6.2
gi|16129771		4.43	14.3		0.96	8.31	31.3	8.59
gi|16130521		6.9	1.41			4.78	8.4	4.32
gi|16130670		4.77			1.87	20.25	5.15	3.2
gi|16131068		1.09		3.85	17.64	7.75	9.6	3.48
gi|16131845		5.02	0.95	3.75	2.55	15.7	5.77	3.86
gi|16128173		14.8	11.52			91.43		9.48
gi|16128695		9.58	19.95	21.44	5.3	45.85	18.34	7.91
gi|16130229		0.72	6.83	8.02	34.13	34.76	6.45	4.33
gi|16130533		0.5		23.28			20.74	4.08
gi|16130961		1.61		8.49			21.61	3.38
gi|16131797		24.32			25.41	14.45	5.21	5.48
gi|16130343		2.46		189.2	185.27	48.31	15.7	3.86
gi|16131123		1.96		139.4		25.93	9.98
gi|16128426		1.96	3.66		6.46		12.62	3.18
gi|16132082		5.28	1.36	4.35		9.06	11.93	5.71
gi|16129223		37.82	11.49	15.53	0.67	7.13	11.53	1.99
gi|16131262		8	5.04				10.59	4.77
gi|16131860		5.53	3.99	4.73	1.78		55.92	7.09
gi|16128458		2.94	2.3			0.18	10.56	4.24
gi|16131190		49.97
gi|16128091		3.07	0.21	7.46	2.67	0.62	15.98	4.91
gi|16129960		0.76	5.55	6.23		24.95	9.91	7.19
gi|16131480		38.04			3.85	34.32		6.73
gi|16131779		1.5		4.61			13.21	2.13
gi|16129055		15.03		15.28		80.75	8.99	4.53
gi|16131630		10.29			9.67	1.52	24.03
gi|16131280		0.82	0.79					10.78
gi|16131482		17.89			2.12
gi|16132222		8.64			2.41	51.37	21.12	5.73
gi|16132234		11.77	14.04	25.87			10.97	4.45
gi|16128068		4.93	2.38		1.18	34.05	9.3	3.51
gi|16128828		11.49	4.65	2.29		6.05	5.71	5.78
gi|16129222		0.4			0.62	0.28	54.98	3.18
gi|16130330		6.6				28.98	17.91	5.13
gi|16128152		0.96	0.37		5.09		5.14	1.85
gi|16128660		10.27		0.99	0.34	11.77	5.95
gi|16129805		6.22	0.94	19.5		4.02	8.47	4.06
gi|16131764		4.54	4.41	14.03		2.56	10.6
gi|16132231		3.98	1.93	1.41	1.54
gi|16128088		1.16	3.54	45.99		24.89	3.17	2.67
gi|16128702		3.69	2.22				20.55	6.39
gi|16129595		0.45	2.46	4.99			14.38	5.54
gi|16130041		1.99	8.47	7.05		10.91	5.52
gi|16131183		6.97					33.52
gi|16131835		7.03	5.88			2.94	10.85	4.24
gi|16131945		1.8	0.08				3.14	0.13
gi|16128698		1.85				2.59	17.61	7.18
gi|16128884		5.47	0.41				7.78	3.72
gi|16131793		1.21	1.49		2.09	0.7
gi|16132218		5.15	4.76				7.6	4.83
gi|16128650		3.07		1.79			12.33	6.66
gi|16131531		7.21			0.56	12.11	11.26	2.22
gi|16129137		4.13				26.71	11.46	5.25
gi|16130516		0.99					12.83
gi|16130815		4.86	6.62	7.07		35.97	12.24	2.18
gi|16130889		6.57	8.65	0.24	2.54	18.19	6.13	4.28
gi|16131862		3.61	0.9
gi|16131939		6.36			3.64		10.54	5.27
gi|16128656		6.71				1.86	19.6	5.83
gi|16129225		5.93					4.97	2.78
gi|16130439		7.6	0.04			13.92	12.25	5.6
gi|16130702		2.26	1.94			14.38	9.06	4.63
gi|16131186		4.71
gi|16131513		2.46					5.2	3.06
gi|16128447		3.32	1.04	47.26			8.86	2.65
gi|16131282		1.42	2.2	3.1			11.95	4.47
gi|16128062		1.5	4	0.43		1.83	10.39	4.5
gi|16128819		10.53			9.84	2.02	19.57	7.22
gi|16129675		1.15	3.33		2.24		14.94	7.57
gi|16131565		0.87	2.72	14.22	2.67	29.74	7.69	5.12
gi|16129497		8.76				0.53	16.72	5
gi|16130455		0.22	5.24	2.05	3.3	5.23	9	2.72
gi|16130812		5.17	0.08				5.62	2.12
gi|16129184		3.12	1.46	1.22	1.59		17.72	5.15
gi|16129670		4.62	3.79	9.31		6.96	12	6.37
gi|16130245		2.03	4.88	5.05		20.97	14.67	5.62
gi|16128124		3.07		1.33			6.48	4.54
gi|16128411		18.15	0.88	2.58	2.21	46.04	12.47
gi|16129562		0.45		67.9		17.82	13.87	4.32
gi|16130221		10.98	10.67		2.7		15.01	8.93
gi|16129926		0.62	0.3			20.03	7.45	3.31
gi|16130589			0.64		6.12	0.59		6.01
gi|16131877		3.16				8.86	5.8	4.28
gi|16132022		48.87	2.03				0.53
gi|16128174		2.46	23.52					3.62
gi|16130197		35.74	1.23				8.05	4.7
gi|16128156		12.55	9.41			11.93	5.34	1.77
gi|16128423		3.49	1.96			0.04	5.57	2.55
gi|16128455		5.25					3.18
gi|16129719		3	11.96	1.14	6.57	21.22	10.71	10.85
gi|16131080		4.07					2.09
gi|16131693		2.07	10.15		1.02	51.56	9.6	8.01
gi|16131704		2.35		1.61	1.11	1.24	1.48	6.06
gi|16131761		0.95	16.73	2.6		2.25	16.53
gi|16131796		5.82		0.7		9.07	4.19	4.29
gi|16132193		32.48				0.79	5.19	1.98
gi|16128417		1.98			0.35	45.46	16.32
gi|16129011		0.38	0.67			0.75	9.94	4.83
gi|16129166		2.02				0.06		4.44
gi|16130189		2.26				10.55	7.05	3.82
gi|16130965		3.31				1.09		4.54
gi|16131278		8.82					18.91	5.44
gi|16131636		12.25					12.94
gi|16131769		1.48						6.78
gi|16129193		5.14					11	4.34
gi|16129572		4.76		0.67
gi|16130247		0.73	0.54				8.07	1.89
gi|16129441		1.65	0.38	49.03		6.67	1.23	1.03
gi|16128714		1.65					8.97	1.05
gi|16130596		2.83					20.06
gi|16131091		4	0.62				22.72	5.58
gi|16131799		0.92					6.76	7.24
gi|16128787		1.75				8.43	9.58	3.63
gi|16130347		9.54		1.48			9.6	3.77
gi|16130731		3.02					18.84	8.2
gi|16130825		1.72					3.54	1.94
gi|16131283		8.55	6.92		1.36	1.25	18.44	6.11
gi|16131964		0.65				5.7
gi|16129057		0.93			0.56		0.51	6.85
gi|16130006		1.56
gi|16130228		1.45	2.22	20.68			8.76	3.42
gi|16131071		1.17	11.27				1.14
gi|16131399		2.56	0.86				3.89	3.48
gi|16131596		3.82		8.23	3	2.19	3.89	3.2
gi|16127997		1.79					29.93	7.38
gi|16128085		0.71	0.04	8.07	0.99	51.23	14.81	5.6
gi|16128806		4.22					5.01	3.08
gi|16128822		0.72		1.94			7.81	4.85
gi|16129560		4.02	3.75	1.18			1.36	2.84
gi|16129962		3.47	1.38			0.51	13.5	5.12
gi|16130440		2.81				0.57		4.94
gi|16130520		3.83		2.08		25.31		5.51
gi|16130711		18.83	11.2			12.81		3.68
gi|16131095		3.25					4.43
gi|16131197		8.23	6.32		0.42	10.25		3.96
gi|16131581		8.96	0.99	1.6			8.14	4.61
gi|16131598		5.96		0.44				5.19
gi|16131679		1.81		0.09			8.15	5.48
gi|16131752		4.43				10.68	7.08	2.82
gi|16132214		0.49
gi|16128149		3.47					3.93	2.69
gi|16128341		1.53					14.34	10.18
gi|16129095		0.21	1.87	4.28		7.64	8.93	4.45
gi|16129561		4.37	0.3		2.3	16.19	7.91	5.14
gi|16129620		0.98						6.03
gi|16129649		0.14						2.01
gi|16130042		2.31		1.22
gi|16130657		6.53						5.17
gi|16130888		4.14	1.88				1.31	3.68
gi|16130924		0.22	5.69	0.01			23.06	6.21
gi|16131042		5.9			0.43	36.26	8.56
gi|16131059		16.06					15.1
gi|16131134		5.01	0.17				5.45	1.63
gi|16131309		2.6			4.88		2.19
gi|16131705		0.1					5.47	4.11
gi|16132057		0.51			0.05	5.09	6.93
gi|16130458		4.88	8.58	3.27	1.33		15.57	3.33
gi|16130838		5.19					7.81	3.11
gi|16131505		11.4	57.05	2.67			9.64
gi|16131800		1.16		1.31		1.55		2.08
gi|16128401		1.87				2.7	11.77	3.4
gi|16128446		1.85	1.66	0.48		22.85	6.39	3.69
gi|16128696		2.14	1.13
gi|16129141		2.08		3.81		10.15
gi|16129237		0.6	0.26	8.72	7.28	5.53	6.15	4.9
gi|16129577		1.2						4.37
gi|16129754		6.25		1.17
gi|16129792		1.62					19.08	3.42
gi|16129981		2.17					11.6	4.9
gi|16130219		0.69				1.74	0.85	4.89
gi|16130492		1.16		0.46				6.76
gi|16130510		0.95	1.31				2.75
gi|16131378		49.4		0.66	1.06
gi|16128016		1.04
gi|16128373		2.59	3.91				6.75
gi|16128435		2.21
gi|16129376		2.25					15.22
gi|16129781		3.66				24.65	8.19	4.09
gi|16130170		5.4					2.35
gi|16130507		10.44	8.71	6.32	2.78	3.88		1.17
gi|16130963		19.69	3.72	8.89	7.13	0.47	10.77	4.27
gi|16131039		4.51					5.3	3.18
gi|16131300		3.82		0.75		18.7	2.43
gi|16131477		10.25	5.54			21.98
gi|16131995		0.13						2.46
gi|16128117		6.83					2.01	1.04
gi|16128330		1.24
gi|16128773		4.87			6.06
gi|16129096		32.58		0.91				2.36
gi|16129172		0.45		5.42	1.68
gi|16129233		0.09
gi|16129600		13.94	3.87				7.39
gi|16129659		0.78	0.95		5.42			3.55
gi|16129677		0.98				11.28	13.2	4.31
gi|16129957		4.81					7.88	3.6
gi|16130188		10.46		4.61		30.93	8.13	3.09
gi|16130738		1.23	2.05	1.99		8.18	7.02	4.56
gi|16131087		4.09		2.21			3.8	4.81
gi|16131326		2.3					26.61	5.2
gi|16131335		0.67		0.47			11.92
gi|16131727		31.14	3.42				12.08
gi|16131731		1.52				13.91		4.55
gi|16131778		3.39			0.8	0.12	2.86	3.83
gi|16132029		4.32	1.22			6.42	7.66	7.77
gi|16132035		8.16	8.82				10.11	5.89
gi|16128512		2.18					9.8
gi|16128708		51.18	0.12			0.33		13.85
gi|16128803		0.11
gi|16129062		0.95
gi|16129077		7.23				0.05	3.26	2.96
gi|16130005		0.15					5.17	5.12
gi|16130529		2.35						3.9
gi|16130797		1.13
gi|16131085		0.41		0.05
gi|16132183		2.6						3.42
gi|16132192		39.59		1.52				2.37
gi|16128075		5.66				1.86	7.93	5.87
gi|16128087		6.91
gi|16128142		37.51	0.74	0.59			0.41	1.35
gi|16128247		12.62
gi|16128393		1.56	2.3		1.53		5.22
gi|16128742		3.49					3.12
gi|16129068		1.29			2.51	0.91	8.3
gi|16129174		1.37						4.06
gi|16129199		2.33	1.58				15.91	4.4
gi|16129639		3.44
gi|16129643		0.45						8.37
gi|16129776		1.3						3.19
gi|16129823		0.91		0.43				5.9
gi|16130081		1.36	0.53
gi|16130109		0.17	1.57				24.64	7.41
gi|16130253		0.57		6.43			4.03	5.42
gi|16130452		3.16			1.09			4.36
gi|16130725		8.13	4.67	5.44			4.88	3.2
gi|16130906		3.12		2.62		20.3	11.92	8.46
gi|16130934		0.63					8.14	4.75
gi|16131306		1.21					2.91	6.7
gi|16131353		12.55
gi|16131476		0.05				4.72
gi|16131487		0.2					3.51	2.92
gi|16131514		2.02	0.99				1.15	6.04
gi|16131524		5.97			2.52		4.98	1.92
gi|16131635		0.14
gi|16131540		0.14					8.19
gi|16131848		5.16						3.9
gi|16131990		0.2					5.69
gi|16132002		32.3			0.42		9.63	4.9
gi|16132054		0.88		3.04			8.51	4.83
gi|16128140		2.29
gi|16128180		2.01
gi|16128258		0.36	1.19			11.71	13.83	2.46
gi|16128306		48.08
gi|16128319		0.97
gi|16128464		0.87						3.54
gi|16128644		2.99					3.08	1.07
gi|16128848		1.33
gi|16129599		0.22				18.36	6.14
gi|16129961		2.53					21.94	9.75
gi|16130000		2.21
gi|16129972		2.21
gi|16130003		1.88
gi|16130338		21.69
gi|16130505		0.78		0.47			6.74	3.36
gi|16130537		0.7				20.16		5.39
gi|16130693		16.64
gi|16130837		1.8						3.06
gi|16130856		1					0.98
gi|16131024		1.51
gi|16131067		1.83					0.21	3.43
gi|16131302		0.4					14.08
gi|16131413		0.22				0.09
gi|16131470		1.53
gi|16131685		6.74					10.02
gi|16131688		0.75				0.34
gi|16131690		8.56					8	4.69
gi|16131806		1.16
gi|16131884		11.43	1.17			10.83	1.88	0.94
gi|16131979		0.14
gi|16131904		0.14						2.02
gi|16128092		1.6
gi|16128168		2.31
gi|16128153		2.31
gi|16128220		1.3
gi|16128349		1.43
gi|16128353		1.82						5.29
gi|16128454		0.95				0.99
gi|16128460		0.7
gi|16128477		3.46					12.78	4.22
gi|16128658		3.5
gi|16128812		3.97				0.32	1.49	1.59
gi|16128970		1.3		2.16			3.39	2.89
gi|16128978		2.61
gi|16129240		2.04				0.18
gi|16129342		0
gi|16129489		2.08
gi|16129779		12.14
gi|16129830		0.9
gi|16130055		0.51
gi|16130054		0.51
gi|16130063		0.27					2.35
gi|16130133		3.68					0.37
gi|16130156		0.05
gi|16130163		0.42
gi|16130264		1.04						4.22
gi|16130292		7.02
gi|16130355		2
gi|16130491		1.8
gi|16130649		3.06
gi|16130781		0.23
gi|16130765		0.23	0.26					5.83
gi|16130776		0.23
gi|16130780		0.23	0.26
gi|16130788		13.77
gi|16130850		0.14
gi|16130986		2.27
gi|16131092		6.24
gi|16131217		65.06	1.53
gi|16131273		3.83		1.67		0.09
gi|16131311		4.05
gi|16131402		0.85
gi|16131720		2.23
gi|16131689		2.23						3.25
gi|16131692		2.23
gi|16131938		5.3						4.9
gi|16131986		3.13	5.04				1.94	4.82
gi|16132000		0.97
gi|16132121		0.48
gi|16132212		1.51		4.13				7.23
gi|16132224		1.32
gi|16132254		6.11
gi|16132271		0.07			2.84
gi|16131061			15.07		35.48	45.69	12.77	5.24
gi|16129828			7		4.35			2.14
gi|16129198			12.52	47.27		12.85	12.26	4.29
gi|16131483			0.6	0.23	5.89		7.09	3.89
gi|16130070			2.06		6.02		13.07	4.5
gi|16128875			14.22	3.31		6.42	18.59	3.96
gi|16132201			13.11	4.62	20.37	59.03	12.68	10.56
gi|16129453			0.7	15.94	32.26	50.66		9.35
gi|16128297			2.06	16.56	4.17		7.85
gi|16129570			1.57				1.47	9.07
gi|16130904			1.64			12.79	6.79	2.55
gi|16129235			6.57	3.91		12.27	15.29	3.87
gi|16128510			1.49				13.64	5.6
gi|16130876			1.56					1.04
gi|16128856			3.95		10.46	38.24	15.43	6.52
gi|16131541			6.22				21.83	6.56
gi|16130600			7.51		1.74		10.78	6.83
gi|16129025			10.81			9.4	5.49	2.74
gi|16130793			0.94			0.79	7.57	4.92
gi|16129638			48.67	54.66		9.85	9.38	3.9
gi|16130915			0.08				11.97
gi|16131867			1.39	8.6	0.51	1.26	9.36	3.87
gi|16128322			0.37			36.11	6.14	2.9
gi|16129668			74.45			28.97	8	3.66
gi|16129804			0.95					8.93
gi|16130438			1.11		2.06		6.99
gi|16130496			5				8.04	4.17
gi|16131160			6.28	43.36		26.84	12.67
gi|16128576			3.5	2.16			18.72	3.48
gi|16128699			0.14					8.31
gi|16128747			23.1		2.93	3.7	5.26	0.87
gi|16131215			3.03			13.38	31.93
gi|16128025			3.47	26.8			15.74	6.49
gi|16128071			2.67		52.23	35.41	9.47
gi|16128717			0.34			7.56	6.95	2.5
gi|16131312			0.46					4.31
gi|16131404			0.28		2.38	0.14	3.05
gi|16128651			3.69				6.27	2.98
gi|16128685			3.15				10.27	2.48
gi|16131471			4.7			25.17		6.48
gi|16131996			1.71			17.55	6.85
gi|16128191			1.75			55.3	13.7
gi|16129072			0.32				2.55
gi|16129182			3.75				10.15
gi|16129242			11.76				5.84	3.23
gi|16129571			1.48					3.8
gi|16129596			12.21				13.5	5.2
gi|16131054			13.2		6.49	4.23	5.4	2.95
gi|16131344			2			37.93	8.55
gi|16128272			1.77		5.28	21.51	5.86
gi|16128885			2.79	7.94			10.1	5.76
gi|16129623			3.55				8.85	4.49
gi|16129693			6.59		3.27	19.34	5.65
gi|16130255			12.23	0.62		25.91	11.44	4.85
gi|16132067			0.92	35.74		2.54	0.37	0.34
gi|16128127			72.28		19.24		10.86	5.59
gi|16129142			1.16			21.94	5.5
gi|16130030			8.47
gi|16130794			5.87
gi|16131665			5.4					2.03
gi|16132200			2.47		4.23	14.9	6.81	4.51
gi|16128182			0.59			7.91	2.85	1.93
gi|16129167			1.85		8.34			4.3
gi|16130035			1.7			4.47		2.54
gi|16130146			1.31
gi|16130235			2.46		0.22			4.68
gi|16130427			0.09					3.23
gi|16130717			7.98
gi|16130903			5.69
gi|16131840			1.93
gi|16132273			14.53	15	3.67	19.39	29.18
gi|16128053			0.07		0.63	52.2		3.84
gi|16128662			2.83				5.58
gi|16128890			4.52			36.13	1.82	4.32
gi|16129635			1.24
gi|16129858			2.44				8.42	3.44
gi|16129908			1.03
gi|16130251			3.91	2.25			9.34
gi|16131839			0.11				2.84	8.24
gi|16128590			2.52				1.38
gi|16128795			2.8				2.94	4.9
gi|16129039			5.99
gi|16129171			16.3
gi|16129660			1.02	2.7				4.54
gi|16129732			0.77
gi|16129741			0.12
gi|16129982			1.1	0.7		15.44	5.93	3.72
gi|16130389			0.47					5.37
gi|16130182			0.47
gi|16130949			0.3		1.2		1.95	4.54
gi|16131162			5.15					3.72
gi|16131861			1.94
gi|16131865			1.89			12.09	2.61
gi|16131883			5.37		0.75			3.85
gi|16132205			1.77	28.88			1.43	5.53
gi|16128110			9.34
gi|16128478			6.33				6.08
gi|16128777			6.15	7.42
gi|16129443			25.85
gi|16129642			0.24	1.63
gi|16129679			0.26					6.23
gi|16129820			0.4			2.66
gi|16130072			10.79				2.08
gi|16130673			27.29
gi|16130652			27.29	7.08		0.48		4.85
gi|16131017			1.14				6.96	7.33
gi|16131062			5.88
gi|16131221			2.33				15.47
gi|16131365			5.15
gi|16132181			9.5			0.69
gi|16128013			0.37
gi|16128019			1.93			9.79	7.75	3.74
gi|16128058			4.43
gi|16128038			4.43
gi|16128049			4.43
gi|16128077			1.93
gi|16128199			2.21	1.53		3.17	2.06	3.45
gi|16128238			0.11
gi|16128653			1.34				3.08
gi|16128891			0.77	1.43		35.43		3.91
gi|16128912			0.89	2.66		2.7	5.65
gi|16128949			2.61
gi|16128947			2.61
gi|16129004			56.92
gi|16129009			1.79	1.63
gi|16129079			0.7
gi|16129125			1.41
gi|16129232			15.43				13.19	1.24
gi|16129238			9.31				11.54	4.62
gi|16129361			3.87
gi|16129301			3.87
gi|16129322			3.87
gi|16129344			3.87
gi|16129407			56.87
gi|16129551			1.74
gi|16129666			4.23			5.89	20.28	2.86
gi|16130108			2.34
gi|16130213			0.15
gi|16130333			14.57
gi|16130313			14.57
gi|16130404			15.78
gi|16130486			0.86
gi|16130509			0.7
gi|16130654			4.51					3.97
gi|16130784			0.26
gi|16130766			0.26
gi|16130987			1.03				0.61
gi|16131136			0.01	2.61			8.63	2.72
gi|16131168			0.69				9.19	7.82
gi|16131234			0.68					7.28
gi|16131334			2.48
gi|16131339			0.28			4.37
gi|16131405			0.03
gi|16131421			1.81
gi|16131498			0.99
gi|16131615			4.21
gi|16131614			4.21
gi|16131621			0.12
gi|16131923			2.71
gi|16132154			2.75
gi|16132159			0.19
gi|16132206			5.06					6.16
gi|16132199			5.06					3.94
gi|16131748				92.99	27.99	15.6	4.33	2.35
gi|16131997				2.69
gi|16129802				16.81			8.02	3.29
gi|16131612				88.35		4.62	24.8	13.87
gi|16131079				2.41			28.82	7.02
gi|16131267				2.14		24.05	15.06	3.18
gi|16131367				19.16		18.22	8.63
gi|16128398				4.72			8.26
gi|16129773				14.76				2.34
gi|16130031				5.85
gi|16132001				2.9	4.92	2.07	12.92	4.7
gi|16129969				1.79			8.77	4.3
gi|16128715				0.75		18.75	9.08	4.51
gi|16130437				6.24		10.05
gi|16130457				1.74			17.64	6.04
gi|16128120				3.92			12.46
gi|16129050				2.59				4.22
gi|16130852				7.45		1.15	10.99	4.96
gi|16129236				3.97			1.29	1.98
gi|16129799				0.66			3.53	2.12
gi|16129683				0.13			2.4
gi|16131099				3.39			4.63	4.19
gi|16128224				1.15		71.66		7.32
gi|16128506				3.33		2.96		3.46
gi|16128772				0.18			11.1
gi|16130823				15.13		5.98	9.78	4.31
gi|16128614				3.65			26.93
gi|16128833				38.14		10.66	17.96
gi|16130456				77.44			4.82
gi|16131664				13.12			6.62	2.89
gi|16130811				20			6.58	2.44
gi|16130353				0.24			0.48	9.63
gi|16131052				19.98		23.15	6.75	2.04
gi|16132044				2.38			4.83
gi|16129143				0.05		9.89	4.99	2.39
gi|16130263				1.96		6.76	9.36	2.54
gi|16131065				44.6		10.59	11.68
gi|16132213				2.67
gi|16128575				9.98			9.65	3.67
gi|16128619				0.27
gi|16128785				3.16
gi|16129046				0.13
gi|16131057				1.37	1.08			6.52
gi|16131633				3.59			10.9
gi|16130236				2.65			5.89	2.51
gi|16130602				0.85
gi|16131077				0.42		4.05		6.78
gi|16131463				0.21				3.6
gi|16131993				1.14
gi|16128499				5.1
gi|16129259				1.81
gi|16129721				2.3
gi|16130357				0.21	11.43			1.83
gi|16130575				0.5		0.56		3.43
gi|16130726				0.34			11.67	7.56
gi|16130898				0.01
gi|16128798				1.2		4.49	4.69	1.65
gi|16128853				0.78
gi|16129026				10.7	1.73	0.99
gi|16130226				0.55				3.42
gi|16132055				7.7		10.87	9.53
gi|16132190				0.11
gi|16128416				3.02
gi|16128437				1.29		1.17		3
gi|16128456				0.03
gi|16128936				0.83
gi|16128923				0.83
gi|16129356				0.08			3.86
gi|16129374				2.03			3.78	3.55
gi|16129925				0.13
gi|16130224				2.37				0.92
gi|16130586				1.8
gi|16130990				29.31		2.12
gi|16131115				0.39		4.14	1.85
gi|16132203				8.66		4.32
gi|16132220				1.38			0.3
gi|16128480				3.14
gi|16128735				1.96
gi|16128751				2.82		0.51	3.95
gi|16128816				1.09	36.16
gi|16128857				0.36	0.06
gi|16129695				0.27
gi|16129688				0.27
gi|16129702				0.37
gi|16130017				1.8
gi|16130007				1.8			0.53
gi|16130360				5.23		55.95
gi|16130499				0.05			0.31
gi|16130881				9.56
gi|16130884				1.48
gi|16131072				4.18
gi|16131911				0.07
gi|16130687					13.24	43.6	11.94	4.69
gi|16129047					0.6	12.16		8.54
gi|16131770					6.86
gi|16131176					3.57	4.62		13.58
gi|16128138					11.46	39.18	14.42	4.75
gi|16128850					2.18	1.74	1.2	1.05
gi|16128712					3.07
gi|16128409					1.82	19.06		5.24
gi|16130246					0.05		9.02
gi|16131088					2.67			4.69
gi|16128438					0.63
gi|16129772					1.4
gi|16130220					6.44		3.24	2.23
gi|16128041					0.77
gi|16128408					2.96		17.21
gi|16129228					6.07			6.6
gi|16129462					15.23
gi|16130441					0.64
gi|16130866					2.89			4.28
gi|16131336					1.76	0.71		3.55
gi|16131512					1.79
gi|16131650					0.88	0.27
gi|16132171					10.41		4.94
gi|16129787					8.06
gi|16130337					5.47	0.11	13.3	9.73
gi|16130562					1.99
gi|16131266					1.44			3.86
gi|16131592					0.71			3.66
gi|16131532					0.71
gi|16128331					0.34
gi|16128335					1.38
gi|16128346					2.64		0.16
gi|16128503					3.28
gi|16128597					0.46
gi|16128642					1.68		16.78	6.1
gi|16129090					0.31
gi|16129339					0.14		20.32
gi|16129545					11.99			6.75
gi|16129502					11.99
gi|16129573					2.59
gi|16129664					0.34
gi|16129890					1.21
gi|16129940					0.62
gi|16130021					5.78	6.64	14.55	4.6
gi|16130175					1
gi|16130165					1
gi|16130183					2.43
gi|16130184					1.17			3.43
gi|16130195					1.31
gi|16130196					1.4
gi|16130282					8.34	6.76
gi|16130493					0.32
gi|16130531					0.46	8.6	1.87
gi|16130550					7.22
gi|16130638					2.67
gi|16130707					0.85
gi|16130954					2.32		9.95	4.61
gi|16131337					8.38		0.8
gi|16131341					19.69
gi|16131539					2.52
gi|16131554					2.13
gi|16131906					24.58
gi|16132215					0.61
gi|16132255					5.87
gi|16132259					2.84
gi|16128769						11.72	13.59	7.66
gi|16131795						15.35	5.65	2.19
gi|16128425							13.87
gi|16128643						7.31	7.12	4.24
gi|16128147						8.74	7.15	3.25
gi|16131242							11.38	4.4
gi|16128228						7.89	0.19	3.68
gi|16131330							10.9	6.57
gi|16130909							3.37	2.02
gi|16131488						10.99	5.53	5.01
gi|16130448						32.34	6.57	2.9
gi|16131425							0.1	19.35
gi|16131443							8.53	3.31
gi|16128113						0.84	10.44	6.43
gi|16130506						30.41	6.58	2.37
gi|16128807						8.85	4.85
gi|16129027							5.26	3.59
gi|16131777						27.17	22.96	7.36
gi|16128898						24.88	4.1
gi|16129064							3.57
gi|16129294						13.15	5.99	3.55
gi|16129855								26.19
gi|16128580						6.13
gi|16128507						35.41	10.91
gi|16129582						1.29	5.12	2.54
gi|16129245						9.22		6.74
gi|16129968							6.55
gi|16130436						1.87		4.74
gi|16132198						20.97	5.49	3.18
gi|16128513						6.1	11.59	7.31
gi|16130590							18.09
gi|16131038							14.59	5.03
gi|16131431						3.2		7.12
gi|16128114							12.84
gi|16130810						19.32	2.87	3.67
gi|16131608
gi|16128226						8.75	3.91
gi|16128229							10.12	4.62
gi|16129080							9.78	3.58
gi|16130501								3.99
gi|16131647							4.1
gi|16128968								1.74
gi|16130993						5.63	3.84	2.48
gi|16131083							13.39
gi|16131481							7.95	4.7
gi|16131682								7.25
gi|16131728						6.52	0.05	5.03
gi|16130348						5.72	2.28
gi|16130390						7.42	5.2	2.76
gi|16130722
gi|16131479							9.64	3.84
gi|16131569								4.4
gi|16128078								5.55
gi|16128097						40.43	5.67	2.81
gi|16128189						38.41
gi|16128881							11.51
gi|16129019								3.32
gi|16129071							1.65	3.96
gi|16129150							1.66	2.39
gi|16130593							17.56	2.23
gi|16128655
gi|16129673
gi|16131327						0.54
gi|16131573							3
gi|16128568						4.23		3.15
gi|16129061								5.69
gi|16129163							10.2	2.35
gi|16130239								1.93
gi|16130397						47.16	5.29	2.99
gi|16131504
gi|16131606							1.63
gi|16131987							27.41	4.52
gi|16128442							0.73
gi|16128613								3.95
gi|16128998						25.69	15.51	2.4
gi|16129619						2.07
gi|16131644							5.55
gi|16131767							9.58	2.26
gi|16131829								7.91
gi|16129610								2.48
gi|16130937						9.66	2.46	1.05
gi|16131825
gi|16132076						9.65
gi|16128009						2.09
gi|16128405							0.17	4.04
gi|16128490						6.56	7.44	4.99
gi|16129248
gi|16129785
gi|16130498							10.61	3.55
gi|16130964						15.31
gi|16131122
gi|16131642								5.91
gi|16128023						18.82		2.63
gi|16128079								7.54
gi|16130795								4.37
gi|16130828
gi|16129827							0.43
gi|16130640								3.59
gi|16130853
gi|16131169
gi|16131526							1.31
gi|16129066							9.96
gi|16129097							7.49
gi|16130740
gi|16131041
gi|16131163							7.49	5.32
gi|16131304							9.7
gi|16128205							7.48
gi|16128420							0.75
gi|16128554
gi|16129329
gi|16130096
gi|16130325
gi|16131276								2.72
gi|16131522						6.03
gi|16131611
gi|16131721
gi|16132223								5.6
gi|16128382						4.37
gi|16128395
gi|16128486
gi|16128844
gi|16129722							7.81	3.1
gi|16129817						1.15		2.61
gi|16129859						1.48
gi|16129939								6.9
gi|16130579
gi|16130480
gi|16131363
gi|16131427							1.92
gi|16131978
gi|16128529
gi|16128707
gi|16128913
gi|16128871
gi|16128926
gi|16129024							0.16	0.12
gi|16129016
gi|16129131
gi|16129255								3.74
gi|16129335
gi|16129464
gi|16129426
gi|16129480
gi|16129469
gi|16130010
gi|16130095
gi|16130085
gi|16130161
gi|16131001
gi|16131394
gi|16131736
gi|16132090
gi|16132075
gi|16130718						24.14	10.45
gi|16128788						0.9		5.16
gi|16131124						8.19	4.51	2.98
gi|16129029						0.43
gi|16130607						0.97	1.98	8.38
gi|16128000						18.61		5.37
gi|16128854						0.73
gi|16128571						2.29
gi|16129746						20.76
gi|16131940						1.18
gi|16132033						0.13		3.95
gi|16128859						0.03
gi|16129091						3.78		2.69
gi|16129569						5.09	3.19	0.9
gi|16129760						29.28
gi|16130311						19.66		2.78
gi|16130356						3.24	9.45	3.46
gi|16130515						2.14		9.31
gi|16131058						0.54
gi|16128201						8.48
gi|16128468						0.67	0.1
gi|16128611						3.04
gi|16130020						2.66	1.4
gi|16130191						33.44
gi|16131000						2.76	6.65
gi|16131478						19.65	0.08	4.51
gi|16128269						2.39		3.73
gi|16128399						2.53
gi|16128637						2.32
gi|16128686						6.06		12.8
gi|16129231						1.87		4.24
gi|16129286						32.77		2.78
gi|16129920						1.42
gi|16130450						0.6
gi|16131028						14.19	0.01
gi|16131073						1.27		6.01
gi|16131369						0.48
gi|16131758						2.75
gi|16131984						0.09
gi|16128240						11.71	1.6
gi|16128815						8.85
gi|16128919						2.17
gi|16129261						0.46
gi|16129445						0.62
gi|16129825						0.17
gi|16130393						45.85	9.45	3.47
gi|16130420						35.25		2.38
gi|16130539						0.3	6.22	3.34
gi|16131171						1.94
gi|16131807						0.08
gi|16131763						0.08
gi|16131960						22.9		3.43
gi|16128323						1.57
gi|16128760						40.83
gi|16128767						83.49
gi|16129129						0.27
gi|16129366						2.57
gi|16129421						1.59
gi|16130365						0.89	1.61
gi|16130385						32.34
gi|16130473						0.74	19.85
gi|16130500						0.58
gi|16130697						2.07
gi|16130739						19.95
gi|16130927						1.01
gi|16130989						7.53	3.17	1.91
gi|16131445						0.04		7.46
gi|16131459						7.71
gi|16131472						7.51
gi|16131674						0.27
gi|16131653						0.27
gi|16131730						2.3
gi|16131723						2.3
gi|16132269						2.59
gi|16131972							20.19	4.72
gi|16128851							12.34	3.95
gi|16131303							6.32
gi|16128164							1.1	4.51
gi|16128746							0.23	4.97
gi|16128741							0.77
gi|16130426							5.75
gi|16130576							2.67	3.5
gi|16130124							20.75	6.31
gi|16129197							7.68	6.62
gi|16131288							4.78	3.37
gi|16129454							3.04
gi|16130265							10.19	4.03
gi|16130419							2.91	3.51
gi|16128378							11.34	5.23
gi|16128869							16.63	4.88
gi|16131879							30.74	10.79
gi|16131895							10.69
gi|16131985							9.55	3.35
gi|16128081							19.89	3.86
gi|16128084							13.48
gi|16128366							11.3
gi|16128374							11.77
gi|16129605							3.51
gi|16130960							4.19
gi|16131462							0.14
gi|16128388							13.95	11.98
gi|16129008							4.67
gi|16129720							0.79	5.27
gi|16130701							5.78	6.49
gi|16130910							6.41	2.55
gi|16131223							3.48
gi|16128620							2.79
gi|16128790							3.52	2.27
gi|16130928							15.65	5.28
gi|16131395							9.37
gi|16131657							12.77	6.41
gi|16131969							7.34
gi|16128083							54.43
gi|16128193							13.83	4.54
gi|16128379							7.1	3.57
gi|16129598							5.69	4.99
gi|16130097							2.48	1.23
gi|16130276							4.35	0.96
gi|16130445							8.21
gi|16131511							17.73
gi|16131661							12.57
gi|16128935							15.84
gi|16128983							4.65	4.37
gi|16129337							0.77
gi|16130250							10.26	4.76
gi|16130396							5.26
gi|16130651							9.34	2.77
gi|16131093							4.16	2.15
gi|16131625							15.89
gi|16131750							1.83	4.95
gi|16131766							15.98
gi|16132063							2.8
gi|16128175							6.58	4.54
gi|16128587							1.38
gi|16128709							0.45
gi|16128752							8.97	5.14
gi|16128796							0.02
gi|16129718							1.33
gi|16130277							34.91
gi|16130893							7.31
gi|16131801							12.07
gi|16128320							2.31
gi|16128367							4.99
gi|16128616							6.82
gi|16128687							13.48
gi|16128794							3.94
gi|16128817							1.88
gi|16128802							1.88
gi|16128834							9.14
gi|16129213							0.52	10.25
gi|16129291							11.47
gi|16129876							7.83
gi|16129967							10.19	3.31
gi|16130177							15.54
gi|16130449							9.05
gi|16130672							5.77
gi|16130683							15.75	5.2
gi|16131070							14.16	5.42
gi|16131140							6.49
gi|16131225							9.12	2.76
gi|16131291							2.91
gi|16131523							7.82	4.21
gi|16131501							7.82
gi|16131627							3.35
gi|16131847							9.45
gi|16131873							1.43
gi|16128243							1.6
gi|16128262							0.69
gi|16128757							3.02
gi|16128903							7.98
gi|16129153							8.29
gi|16129762							0.38
gi|16130141							0.21
gi|16130140							0.21
gi|16130332							23.37
gi|16130581							0.46
gi|16130623							23.4
gi|16130706							0.4
gi|16130790							4.52
gi|16130854							11.05
gi|16130976							0.28
gi|16131258							11.42
gi|16131545							14.57
gi|16131903							7.29
gi|16131878							7.29
gi|16131896							7.29
gi|16131913							4.95
gi|16131961							5.26
gi|16132089							16.79
gi|16132148							8.25
gi|16132156							2.35
gi|16132266							9.84	0.71
gi|16132251							9.84
gi|16132252							9.84
gi|16130803								4.6
gi|16128350								1.88
gi|16128310								3.33
gi|16128838								7.41
gi|16129594								5.27
gi|16130451								3.82
gi|16129051								4.02
gi|16129408								5.1
gi|16128045								4.58
gi|16130899								3.09
gi|16131442								22.76
gi|16132049								3.04
gi|16132172								6.75
gi|16131863								6.99
gi|16128641								3.83
gi|16128144								5.41
gi|16129230								4.81
gi|16129634								0.96
gi|16130713								1.43
gi|16131069								5.96
gi|16129042								6.71
gi|16130298								5.42
gi|16131656								5.61
gi|16128196								1.52
gi|16131557								3.48
gi|16132143								8.24
gi|16129766								4.77
gi|16130115								1.81
gi|16128793								7.32
gi|16128877								2.25
gi|16129389								3.93
gi|16130603								4.06
gi|16131707								12.93
gi|16128141								2.19
gi|16128461								5.88
gi|16130528								4.18
gi|16131305								3.82
gi|16131571								5.5
gi|16131583								2.96
gi|16131828								2.64
gi|16132056								3.63
gi|16132065								3.17
gi|16132227								9.96
gi|16128042								6.18
gi|16128176								5.76
gi|16128296								6
gi|16128340								3.21
gi|16128402								6.66
gi|16128872								6.28
gi|16129162								3.83
gi|16129483								1.9
gi|16129798								0.24
gi|16130615								3.61
gi|16130700								1.37
gi|16130970								4.79
gi|16131643								1.01
gi|16131776								4.45
gi|16131820								1.91
gi|16131826								7.41
gi|16131991								6.13
gi|16132207								9.64
gi|16132236								2.49
gi|16128225								2.28
gi|16128557								4.2
gi|16128566								2.61
gi|16128864								1.64
gi|16129115								2.18
gi|16129260								2.41
gi|16129290								3.19
gi|16129429								1.48
gi|16129518								4.51
gi|16129549								4.92
gi|16129587								3.29
gi|16129761								8.3
gi|16129944								10.62
gi|16130273								0.93
gi|16130364								4.68
gi|16130447								2.67
gi|16130719								3.06
gi|16130913								1.19
gi|16130968								1.27
gi|16130992								2.48
gi|16131113								8.23
gi|16131179								4.62
gi|16131675								2.23
gi|16132144								7.06
gi|16128031								0.58
gi|16128090								2.04
gi|16128125								0.52
gi|16128212								4.23
gi|16128230								3.11
gi|16128304								3.73
gi|16128321								24.46
gi|16128332								3.43
gi|16128479								2.81
gi|16128470								2.81
gi|16129410								3
gi|16129433								4.14
gi|16129449								4.9
gi|16129543								6.75
gi|16129589								3.38
gi|16129716								5.27
gi|16129921								1.64
gi|16129919								1.64
gi|16129952								5.32
gi|16130026								2.05
gi|16130120								0.74
gi|16130130								6.9
gi|16130143								2.78
gi|16130203								3.06
gi|16130474								2.68
gi|16130660								3.9
gi|16130774								5.83
gi|16130809								169.02
gi|16130966								5.02
gi|16131265								3.86
gi|16131275								3.86
gi|16131295								0.11
gi|16131319								1.3
gi|16131343								6.37
gi|16131371								3.21
gi|16131385								10.15
gi|16131429								1.73
gi|16131577								6.98
gi|16131686								3.82
gi|16131654								3.82
gi|16131734								10.39
gi|16131789								2.13
gi|16132088								6.17
gi|16132157								3.97
gi|16132122								3.97
gi|16132180								1.71
gi|16132260								3.6

## Sheet: BW25113 Normal Condition
LOCUS	5min	15min	30min	45min	60min	90min
gi|16131218	27.78	8.17	3.44	1.95	1.3	0.61
gi|16131576	41.98	11.15	23.98	3.07	6.5	1.93
gi|16131678	25.69	6.28	2.11	1.04	0.66	0.31
gi|16131219	26.61	11.34	4.86	2.47	1.59	0.67
gi|16129452	2.62		5.98	2.21	4.83
gi|16130686	29.72	10.69	5.83	3.03	1.99	0.91
gi|16131968	25.17	23.25	8.28	4.03	2.11	0.68
gi|16128878	17.85	6.65	3.9	1.85	1.09	0.48
gi|16131632	27.66	10.26	3.07	1.62	0.98	0.43
gi|16131841	43.51	31.3	9.08	4.49	2.48	1.14
gi|16131175	27.97	7.96	3.38	1.81	1.16	0.57
gi|16128107	28.95	13.34	4.46	3.19	1.97	0.81
gi|16130476	26.1	12.95	7.4	2.74	2.04	0.96
gi|16130827	48.93	17.92	6.57	3.9	2.02	0.97
gi|16132025	23.96	7.31	3.66	1.68	1.1	0.55
gi|16129204	19.25	19.81	12.19	4.9	4.17	1.89
gi|16130340	33.7	9.29	4.91	2.73	1.61	0.69
gi|16131102	9.3	11.93	4.13	1.49	1.16	0.48
gi|16131600	20.95	9.27	3.44	1.94	1.16	0.57
gi|16131814	23.55	9.23	3.6	1.66	1.11	0.54
gi|16128421	29.73	8.27	4.78	2.08	1.24	0.55
gi|16129202	33.63	17.31	8.52	4.75	3.34	1.33
gi|16128109	45.56	12.79	4.84	2.86	1.74	0.67
gi|16131817	25.09	8.34	4.21	2.14	1.15	0.57
gi|16129099	22.62	12.15	4.04	2.04	1.21	0.5
gi|16128924	45.06	11.39	4.88	2.37	1.46	0.66
gi|16129733	48.44	9.88	4.29	2.12	1.54	0.69
gi|16130152	68.97	37.25	14.55	6.63	5.3	2.97
gi|16131185	28.87	6.35	3.08	2.24	0.69	0.42
gi|16131182	29.66	9.48	3.2	1.94	1.12	0.55
gi|16129870	10.75	3.34	1.22	0.42	0.2	0.04
gi|16132067	59.37	8.41	2.59	1.78	1.13	0.66
gi|16131818	14.75	11.53	3.02	1.74	1.18	0.56
gi|16128588	64.35	19.48	6.39	3.33	2.01	0.72
gi|16130033	26.59	14.86	6.78	3.63	2.13	0.91
gi|16128111	21.23	10.65	3.07	1.49	1.09	0.39
gi|16128870	47.58	9.79	6.14	4.15	2.13	0.75
gi|16127996	24.76	13.33	3.9	2.06	1.58	0.69
gi|16128896	17.45	5.3	1.81	0.99	0.57	0.25
gi|16131602	29.39	10.25	3.22	1.86	1.17	0.53
gi|16131177	25.86	8.47	3.24	1.86	1.22	0.55
gi|16128782	37.12	13.98	5.67	3.33	2.91	1.26
gi|16131126	98.19	13.57	6.71	3.01	1.55	0.7
gi|16130342	33.87	9.62	5.81	1.97	1.44	0.71
gi|16130258	31.99	14.89	8	3.67	2.02	0.86
gi|16131187	20.18	8.94	3.67	1.83	1.14	0.55
gi|16128027	14.06	5.8	2.04	1.27	0.94	0.45
gi|16131416	21.4	12.11	4.09	2.31	1.53	0.75
gi|16128008			7.56	3.37	2.09	0.74
gi|16128108	51.13	13.02	6.97	3.01	1.65	0.68
gi|16129970	9.64	13.45	5.67	2.66	1.66	0.69
gi|16131193	19.79	11.25	3.62	2.06	1.33	0.6
gi|16131184	26.22	11.93	3.47	2.08	1.26	0.58
gi|16128970	112.44	56.05	32.66	13.07	10.28	4.64
gi|16128162	29.17	9.69	4	2.17	1.29	0.56
gi|16131198	41.34	9.7	3.02	1.88	1.16	0.55
gi|16131332	31.5	9.18	3.11	1.82	1.08	0.44
gi|16131220	24.95	10.16	4.28	2.25	1.31	0.56
gi|16131063	19.53	5.35	2.67	1.68	1.21	0.53
gi|16132066	78.56	10.2	3.6	1.97	1.25	0.68
gi|16128163	31.73	11.68	4.04	2.35	1.23	0.63
gi|16129632	7.99	12.85	5.64	2.71	2.37	1
gi|16131199	31.25	6.63	3.78	1.8	1.23	0.56
gi|16130433	21.51	6.85	2.6	1.49	1.18	0.62
gi|16131180	33.77	8.01	3.44	1.9	1.13	0.58
gi|16131221	26.44	7.86	3.62	1.69	1.22	0.44
gi|16129285	66.32	20.4	5.65	2.16	1.46	0.66
gi|16131056	24.83	6.8	4.82	2.33	1.4	0.57
gi|16129198	51.02	14.65	5.51	3.55	1.81	0.75
gi|16130527	41.63	14.74	6.44	3.04	1.44	0.53
gi|16130814	0.41	17.05	6.98	2.7	1.47	0.51
gi|16131815	41.92	8.85	3.83	1.78	1.24	0.59
gi|16127998	9.64	7.54	4.62	1.9	1.4	0.55
gi|16128190	25.09	6.22	2.98	1.41	0.85	0.41
gi|16131680	4.69		25.64	14.59	8.4	2.92
gi|16128695	37.1	21.55	6.55	3.63	2.22	0.78
gi|16129715	36.52	16.44	5.49	2.65	1.39	0.57
gi|16131174	27.46	13.43	4.18	2.81	1.54	0.68
gi|16131120	37.16	9.61	3.64	1.85	1.13	0.57
gi|16131999	7.96	16.53	11.42	2.28	1.61	0.65
gi|16129669	1.94	6.78		1.62	1.04	0.58
gi|16131194	35.26	10.85	4.39	2.57	1.31	0.64
gi|16129686	5.21	36.7	11.52	7.43	5.42	2.55
gi|16130826	40.5	20.54	4.62	2.98	1.73	0.89
gi|16131748	74.84	22.93	5.09	3.74	1.55	0.58
gi|16132022	42.9	12.74	3.91	2.01	1.31	0.59
gi|16128020	12.72	8.45	5.78	2.37	1.7	0.83
gi|16129867	34.58	8.94	4.06	2.49	1.47	0.6
gi|16128780	24.16	34.55	4.26	2.39	1.57	0.79
gi|16130513	0.91			1.43
gi|16131430	0.02	11.35	4.49	2.62	1.24	0.73
gi|16128002	93.35	20.35	6.58	3.9	2.69	0.93
gi|16128895	23.47	11.88	4.34	2.52	1.84	0.67
gi|16131060	13.46	9.3	3.39	2.14	1.38
gi|16131188	38.67	15.27	3.25	1.82	1.11	0.59
gi|16128716	53.67	18.36	4.96	3.16	1.32	0.55
gi|16131780	7.01				4.2	2.41
gi|16131813	20.89	9.81	3.15	1.9	1.07	0.56
gi|16129025	52.33	9.95	3.52	2.27	1.65	0.82
gi|16131757	43.08	19.4	5.89	4.03	2.88	1.04
gi|16128066	19.04	6.98	3.47	1.71	1.01	0.26
gi|16128702	11.45	11.34	4.13	1.97	1.67	0.54
gi|16129249	51.93	18.84	5.5	3.62	2.06	0.78
gi|16131176	46.23	10.58	3.8	1.9	1.35	0.62
gi|16131196	34.9	10.55	3.68	2.01	1.21	0.51
gi|16128723	69.19	31.97	9.82	5.55	3.51	1.28
gi|16131189	31.65	8.91	3.65	2	1.22	0.61
gi|16129376	11.86	6.51	4.45	1.84	1.2	0.54
gi|16131639	0.57	14.19	3.96	2.01	1.45	0.52
gi|16131711	11.1	6.4	3.49	1.77	1.2	0.37
gi|16129221	53.94	16.85	5.91	4.06	2.41	1.68
gi|16130482	14.55	7.73	2.38	1.75	1.3	0.5
gi|16130604	0.39	4.8	3.9			0.83
gi|16131173	39.05	10.69	4.4	2.63	1.27	0.61
gi|16131200	20.25	12.31	4.29	2.35	1.25	0.55
gi|16130836	25.11	10.93	4.22	2.42	1.53	0.74
gi|16130432	19.05	7.12	3.05	1.61	1.12	0.81
gi|16132201	19.94	55.79	15.35	5.81	5.53	1.83
gi|16128698	16.96	7.17	2.46	1.38	1.01	0.49
gi|16128921	15.68	10.44	5.73	2.24	1.34	0.55
gi|16131061	13.14	9.52	4.04	1.74	1.52	0.59
gi|16131836	23.46	7.34	3.62	2.61	1.49	0.61
gi|16128897	0.2	10.72	4.63	3.03	1.69	0.52
gi|16130032	34.48	16.56	6.89	3.53	2.26	0.81
gi|16130091	31.3	13.37	6.03	2.71	1.71	0.91
gi|16130343	44.87	11.73	6.46	3.37	1.73	0.8
gi|16130671	10.88	4.75	2.68	1.27	0.98	0.53
gi|16131307	29.17	13.27	4.99	2.93	1.65	0.62
gi|16131121	23.07	13.17	3.94	1.87	1.12	0.6
gi|16131604	39.09	9.16	2.51	1.42	1.04	0.51
gi|16128322	15.93	3.99	2.13	1.08	1	0.55
gi|16128656	11.7	7.93	3.29	2.52	1.54
gi|16128703	30.46	5.58	3.07	1.99	1.16	0.49
gi|16128411	3.5	3.16	4.01	2.28	2.15	0.63
gi|16130245	2.71	13.1	11.01	4.35	3.16	1.44
gi|16132218	23.24		11.87	4.74	3.6
gi|16130035	0.32	28.29	19.2	6.61	5.98	2.34
gi|16131378	35.19		59.66	38.22
gi|16130423	18	9.11	3.62	2.04	1.32	0.69
gi|16130843	4.88	6.2	1.74	1.77	1.05	0.42
gi|16128159	12.1	10.78	4.8	2.45	1.54	0.65
gi|16130034	50.63	19.62	7.29	4.19	3.92	0.75
gi|16130443	19.86	7.21	2.59	1.45	0.81	0.36
gi|16132208	5.37	19.55	3.97	2.67	1.68	0.77
gi|16129170	60.63	15.2	5.1	2.98	1.88	0.89
gi|16129670	17.12	12.16	2.12	1.4	1.16
gi|16128779	35.49	81.84	25.34	13.82	14.78	4.63
gi|16128625	16.06	2.05	1.71	3.7	1.79
gi|16130658	14.52	4.62	1.37
gi|16130670	16.24	4.22	3.04	1.33	0.94	0.57
gi|16131597	3.4	22.71	3.48	1.8		0.55
gi|16129411	3.73	11.92	3.52	6.36	6.27	1.09
gi|16130401	33.49	9.63	3.44	1.87	1.34	0.48
gi|16131183	34.5	12.71	4.85	2.12	1.3	0.56
gi|16128828	17.14	5.12	2.73	1.54	1.04	0.56
gi|16128874	36.49	12.46	4.3	2.19	1.57	0.63
gi|16129819	13.77	10.69
gi|16129838	29.98	17.02	3.68	1.72	1.06	0.44
gi|16130931	5.78
gi|16128026	24.04	5.32	2.93	1.52	1.2	0.55
gi|16129672	24.38	9.86	3.85	1.97	1.13	0.56
gi|16132194	7.08	37.52	12.73		4.56	1.87
gi|16128171	17.03	21.47	6.14	3.34	1.9	0.82
gi|16129027	72.98	57.51	18.02	2.94	7.32	3
gi|16129222	23.13	13.97	4.73	3.37	2.59	0.88
gi|16131068	20.16	0.47	4.8	3.37	1.53
gi|16128458	3.7	5.61	3.84	2.73	1.7	0.74
gi|16128864	1.31	80.2		7.1	12.83	4.71
gi|16128400	56.8	13.92	3.56	2.95	1.64	0.74
gi|16128860	1.47	10.98	6.01	1.45	1.73
gi|16130599	44.25	14.28	7.92	2.76	2.66	1.09
gi|16132048	54.9	8.61	5.65	4.82	1.65	1.22
gi|16128310	21.76		5.03		2.73
gi|16131693	45.08	0.41
gi|16131798	9.93	5.88	3.75	1.44	1.03	0.44
gi|16132080	13.21	12.27	5.03	2.36	1.5	0.57
gi|16128548	20.61	6.39	1.65	1.33	1.28
gi|16131139	0.58	3.28	3.17	1.88	1.7
gi|16128165	38.76	12.51	2.57	2.18	1.47	0.71
gi|16129064	5.1	5.99		1.42	0.81
gi|16130244	0.84	6.64	2.3	1.59	1	0.54
gi|16130455	8.63	5.48	1.8	1.3	0.91
gi|16131119	0.15	14.65	4.47	2.77	1.93	0.8
gi|16131192	31.62	12.61	4.06	2.13	1.16	0.62
gi|16131238	10.12	6.99		1.12	1.75
gi|16131480	57.01	14.35	4.82	2.85	1.75	0.75
gi|16128258	7.73	2.86	1.5	1.33	0.86	0.35
gi|16128423	2.92			1.54
gi|16128590	0.07	4.31	24.1	0.3	8.37	3.98
gi|16127997	26.79	13.56		2.75	1.74	0.61
gi|16128173	44.79	10.36	4.58		1.23	0.4
gi|16132234	6.5	13.15		2.51	1.34	1.55
gi|16131812	12.35	13.69	5.23	2.31	1.4	0.64
gi|16128699	26.66	9.15	3.39	1.68	1.02	0.41
gi|16129773	39.2	17.86	6.04	2.82	2.02	0.74
gi|16131186	42.28	17.36	2.3		1.53	1.14
gi|16128615	24.6		5.58		1.64
gi|16128065	33.45	8.33	2.52	1.6	0.79	0.36
gi|16130576	16.49	1.84		0.64
gi|16128536	123.43	36.95	19.66	10.42	3.54	2.94
gi|16129178	2.5	25.37	8.38	2.43	1.96	0.8
gi|16131076	36.84	12.39	3.39	2.19	1.21	0.54
gi|16131370	0.87	2.44	4.71	2.78	2.37
gi|16131754	0.42	10.93	6.2	4.19	2.6	1.13
gi|16131797	18.32	10.35	2.37	1.78	1.29	0.44
gi|16128143	1.56
gi|16129719	5.5	24.02	6.09	3.5	2.92	0.97
gi|16129803	6.69		5.73	2.52	2.19	0.97
gi|16128731	3.66		1.42
gi|16129011	1.1	0.24				0.65
gi|16129224	4.01	0.82			2.39
gi|16130439	0.03	8.77
gi|16130520	17.07	7.37	1.57	2.3	1.46	0.55
gi|16130522	0.88	13.28	2.96	1.65	1.16
gi|16131599	41.57	13.64	3.68	1.52	1.3	0.61
gi|16128396	1.36			1.33	1.26	0.68
gi|16129030	0.32	0.51	3.49	4.01	1.54	1.06
gi|16130350	0.82	4.06	4.24	3.23	1.76	0.68
gi|16130904	1.09	10.27	2.24		1.2
gi|16131071	0.15					0.59
gi|16128113	13.68	9.17	4.3	1.49	1.37
gi|16129498	13.73	11.03	4.55	2.63	1.81	0.85
gi|16130458	12.32	6.36	2.12	1.02	1.06	0.41
gi|16130606	39.43				1.75
gi|16130669	11.8	3.77	4.7	0.91	0.83	0.35
gi|16128651	4.52				1.37	0.89
gi|16130510	2.3
gi|16131091	2.58			1.47	1.59	0.58
gi|16131282	6.93					1.01
gi|16128663	3.46
gi|16128708	0.02
gi|16130251	0.32
gi|16131228	34.38	13.68	3.98	2.85	1.31	0.42
gi|16131592	1.69		2.86		1.27
gi|16128968	3.16				0.56
gi|16129926	2.53
gi|16131796	2.97	5.49			1.11
gi|16129193	11.95	11.03	4.15	1.92
gi|16129960	45.07	17.98	3.53	3.1	1.52	0.73
gi|16130521	2.22	4.26			1.59
gi|16130722	13.23		2.05	1.57	1.05	0.41
gi|16131303	1.11
gi|16131425	1.16		17.75
gi|16131581	8.86	16.6	6.33	4.44	2.07	1.39
gi|16131705	22.82	7.62		1.57		2.39
gi|16131972	42.43	13.27	3.75	2.12	1.11	0.6
gi|16128164	25.04	7.2	3.4		1.39	0.7
gi|16129054	2.7	4.48	1.26		0.71
gi|16129057	30.12	13.87	3.56	2.46
gi|16129837	36.44	11.68		2.74		0.32
gi|16130239	0.42	0.45
gi|16130795	29.65	11.73
gi|16128118	10	4.11				0.86
gi|16128822	7.48					0.56
gi|16130962	14.18
gi|16132076	11.6	2.92	2.45		0.92
gi|16132036	11.6				2.8
gi|16128054	31.31
gi|16128725	1.46
gi|16129611	44.87
gi|16129840	0.05				0.64
gi|16130446	0.6	0.96
gi|16130456	4.38	1.22	0.51
gi|16130531	30.47
gi|16128102	12.7
gi|16129163	0.31	0.2
gi|16129893	0.13
gi|16130130	0.44
gi|16130803	0.66
gi|16131685	0.15	0.25
gi|16132202	23.78
gi|16128301	16.84
gi|16128368	59.2
gi|16128341	59.2
gi|16128602	41.28
gi|16128758	29.97
gi|16128916	1.51
gi|16129679	2.64
gi|16129717	8.84
gi|16129781	0.97			1.65
gi|16130603	0.86
gi|16130653	0.29					0.83
gi|16130642	0.29
gi|16130676	42.64
gi|16130720	2.83
gi|16130770	0.12
gi|16130789	15.11		1.99
gi|16130785	15.11
gi|16130896	0.43
gi|16130926	7.39		2.39
gi|16131003	31.66
gi|16131167	1.04
gi|16131405	1.7
gi|16131984	0.11
gi|16129614		23.29	9.27	3.99	2.71	1.55
gi|16131816		14.81	3.28	1.81	1	0.53
gi|16131794		10.59	5.97	2.57	1.39	0.52
gi|16130792		8.67	3.75	2.32		0.65
gi|16131840		16.38	5.19	2.48	1.79	0.7
gi|16129693		39.76	18.03	9.95	7.3	2.46
gi|16128509		14.45	6.8	3.27	2.1	0.86
gi|16132074		30.61	8.39	5.5	2.67	1.07
gi|16131851		15.12	6.43	3.63	2.89	1.1
gi|16129237		15.56	1.7	3.32	5.75
gi|16129771		8.86	3.22	1.92	1.57	0.51
gi|16128187		8.69		1.32	2.01	0.64
gi|16129225		28.82	8.36	3.21	3.21
gi|16128223		20.52	4.24	3.48	2.17	0.86
gi|16129674		8.04	4.27	2.26	1.51	0.69
gi|16131779		6.79	3.7	1.5	0.97
gi|16128068		12.71	2.41	1.75	1.05	0.39
gi|16128704		13.16	2.63	2.83	1.55	0.57
gi|16128722		7.35	3.15	2.74	1.17	0.64
gi|16131215		57.62	16.83	10.72	7.08	2.94
gi|16131367		43.12	15.11	6.18	3.02	1.25
gi|16128855		11.41	3.53	1.91	1.47
gi|16129056		9.54	6.11	1.72	1.51	0.54
gi|16129694		12.16	2.4	1.86	1.52
gi|16128422		21.2	5.24	3.54	1.77	0.9
gi|16129941		13.73	4.52	1.34	1.02
gi|16128856		14.77	4.91	3.07	1.58	0.57
gi|16130390		4.4		3.88	4.47	2.2
gi|16131103		11.54	4	2.48	1.3	0.5
gi|16131236		23.52	7.65	3.21	2.57	0.88
gi|16130815		21.32	6.87	3.06	2.35	0.89
gi|16131483		9.72	5.07	2.4	2.1	0.95
gi|16131967		35.88	12.97	4.83	2.16	0.69
gi|16128701		9.86	3.11	1.99	1.23	0.45
gi|16130403		8.95	2.27		1.68
gi|16131075		13.61			1.19	0.54
gi|16128208		24.41	6.49	4.23	1.99	0.99
gi|16132198		51.62	31.6	1.48	3.4	1.5
gi|16128161		15.19	5.54	1.82	1.42
gi|16129562		13.71			2.76	0.65
gi|16130320		20.01
gi|16130330		13.89	4.66	2.84	1.21	0.84
gi|16132029		16.05		2.24	1.74	0.7
gi|16132065		9.33	5.69	2.77	2.23	0.9
gi|16128067		13.17	2.99	0.83	0.88	0.21
gi|16128152		21	4.3	3.28	1.83	0.83
gi|16129593		7.73	11.23	6.56	3.81	1.33
gi|16130388		10.54	4.89
gi|16128119		11.63	4.47	2.07	1.28	0.8
gi|16128419		19.87	4.24	2.2	1.25	0.57
gi|16128561		9.48		1.2	0.98	0.48
gi|16128787		6.26	1.22		1.5
gi|16130448		8.02	3.58	1.8	1.64
gi|16130533		8.51	7.64	3.58	2.1	0.98
gi|16132176		4.92	4	1.5	0.96	0.38
gi|16128664		18.79			2.26
gi|16130201		50.99	17.78	7.87	6.63	2.59
gi|16131290		7.41	1.75	1.88	1.35
gi|16131603		11.67	3.21	1.82	1.51	0.59
gi|16129675		14.3		3.2
gi|16130052		5.29		1.74
gi|16130659		3.38
gi|16130810		2.13	4.25	3.66	2.61
gi|16131330		10.62	2.21	1.37	0.94	0.48
gi|16131628		8.93		1.23	1.05
gi|16129963		12.56		2.15	2.16
gi|16131629		5.9
gi|16128088		4.5		1.65	2.37	0.22
gi|16128660		20.85	3.74	3.06	1.97	1.02
gi|16128768		16.01	7.4
gi|16128877		23.98		3	1.74	1.26
gi|16130492		1.54
gi|16130504		38.28	6.49		7.91	2.89
gi|16131490		5.23	3.45		1.91
gi|16128127		11.55	5.27	2.64	2.1	0.78
gi|16128735		24.21
gi|16129718		0.82	6.83	3.83	1.7
gi|16129734		13.05	2.42	1.65	1.44
gi|16131195		11.6	3.21	1.98	1.68	0.57
gi|16131515		15.94			1.73
gi|16131541		6.06		0.7
gi|16131979		3.41
gi|16132200		3.74		3.3
gi|16129055		7.51	3.48	1.99	1.55
gi|16129223		11.01	6.65	4.47	3.69
gi|16129948		8.63			1.07	0.99
gi|16130218		1.71	2.13		1.3
gi|16130229		22.19	5.97	3.2	2.74	0.99
gi|16130687		4.01	1.82	2.11	1.15	0.6
gi|16129093		9.66
gi|16129599		10.31	5.49	2.39	3.51	1.42
gi|16129962		8.07	1.12	1.5	1.64
gi|16130839		2.29		1.15	1.49	0.71
gi|16131242		12.74	6.18		2.28	1.14
gi|16131293		5.91
gi|16128401		17.14	5.18		1.94	0.78
gi|16128769		4.29	5.91	2.22		0.44
gi|16128899		0.54		1.82	1.04
gi|16128932		24.78
gi|16129966		6.79
gi|16129982		9.29			1.3	0.79
gi|16130247		6.24
gi|16130424		4.85	2.24	1.24	1.03
gi|16130516		6.21	3.29		1.3	0.61
gi|16131264		32.58		2.3	2.37	0.87
gi|16131637		10.96	4.91		1.09	0.87
gi|16128510		0.41
gi|16129058		8.04
gi|16129086		5.02		1.97	1.07
gi|16129560		5.29
gi|16129839		7.43	2.95	1.65	0.73	0.2
gi|16129855		20.88		3.16
gi|16129965		1.12
gi|16129968		9.33
gi|16130506		19.55
gi|16131190		11.75	5.42	1.68	1.39	0.57
gi|16131482		17.58	4.89	2.41	1.39	0.65
gi|16131531		5.56	3.29	1.56
gi|16132222		12.19	2.28	2.25		0.54
gi|16128426		2.81	5.49
gi|16128476		14.93	3.95
gi|16129341		10.26			2.97
gi|16129373		10.22	3.64		1.8	0.61
gi|16130228		10.37		5.8
gi|16130744		13.14
gi|16131059		16.37	2.63			0.64
gi|16131079		1.71			1.5	0.59
gi|16131226		11.57		1.12
gi|16131304		4.41	2.48
gi|16128170		6.91
gi|16129338		26.43	1.17	12.23
gi|16129777		11.61	2.2		1.16	0.42
gi|16130583		15.47	4.32		0.98	0.42
gi|16131057		9.55	2.49		1.61	0.52
gi|16131267		4.24	3.57	4.63
gi|16131767		6.77		1.2
gi|16132041		18.29			2.9
gi|16132227		14.68	5.02	2.88
gi|16128053		1.47
gi|16128224		8.25	3.55	2.08	1.68	0.74
gi|16128226		14.02	4.25		0.91	0.32
gi|16128416		13.72	2.35
gi|16128507		12.59	4.41	3.11	1.32	0.65
gi|16128589		11.59	2.14
gi|16128746		0.78	1.79
gi|16129077		5.74			1.3	0.84
gi|16129228		1.9
gi|16129683		6.72			0.9	0.43
gi|16129974		7.19
gi|16130255		12.45
gi|16130338		10.01
gi|16130348		2.86
gi|16130793		17.81	0.67
gi|16130961		3.63			0.83	0.27
gi|16131624		5.79			1.37	0.6
gi|16128409		2.1
gi|16128644		6.24	2.14
gi|16129083		5.66
gi|16129570		4.56
gi|16129833		4.86			0.69	0.33
gi|16129848		24.5		4.03
gi|16130075		4.96		1.93	1.14
gi|16130457		7.76
gi|16131166		7.62		3.08
gi|16131519		18.48
gi|16131839		2.17			1.05
gi|16132085		0.54			1.16
gi|16128075		2.93
gi|16128490		2.53
gi|16128661		2.23
gi|16128803		3.35
gi|16128838		0.04
gi|16128930		14.17	5.37	1.62	3.16	1.08
gi|16129703		12.94
gi|16130288		10.73
gi|16130530		9.27		1.7	0.5
gi|16131460		0.53
gi|16128016		0.01
gi|16128117		14.36
gi|16128132		4.5
gi|16128321		2.07
gi|16128469		9.34
gi|16128486		6.88		0.84
gi|16128558		4.19
gi|16128890		1.9			1.37
gi|16128888		1.9			3.16
gi|16128891		7.78
gi|16128914		2.77
gi|16129115		9.05		1.94
gi|16129246		0.34
gi|16129508		4.88			1.03
gi|16129564		4.59
gi|16129861		6.35
gi|16129891		8.56
gi|16129944		18.39
gi|16130051		7.94			1.43
gi|16130240		4.56
gi|16130447		2.16
gi|16130445		2.16
gi|16130452		4.24
gi|16130615		0.2
gi|16130638		3.88
gi|16130664		9.82	2.29
gi|16130745		7.22
gi|16130783		4.79
gi|16130794		8.59	3.38
gi|16130847		0.25
gi|16130921		21.85	19.61
gi|16130924		0.73
gi|16131150		2.91
gi|16131169		0.41
gi|16131152		0.41
gi|16131271		5.75
gi|16131285		4.86			1.29
gi|16131508		9.22	3.93	1.47	1.05	0.45
gi|16131591		1.15
gi|16131586		1.15
gi|16131625		5.34
gi|16131610		5.34
gi|16131825		2.31	3.71
gi|16132047		7.63
gi|16132273		1.54
gi|16131710			27.91	13.78	11.23	4.3
gi|16129807			7.82	4.9	3.85	1.47
gi|16130232			4.01	4.31	2.62
gi|16128806			0.76		3.05	0.77
gi|16130154			1.84	1.15	1.13	0.41
gi|16128912			4.48	3.33	1.58	0.86
gi|16131880			2.28		1.51
gi|16131850			5.73	3.06	1.87	0.63
gi|16128453			4.56			0.6
gi|16129737			4.62		6.64	0.26
gi|16129913			5.46	8.64	6.49	0.3
gi|16131877			15.5	9.88	4.4	2.88
gi|16128138			4.13		0.99
gi|16131262			4.83	2.35	1.41	0.69
gi|16131471			7.42	6.15	2.55
gi|16131955			3.42	1.43
gi|16129247			2.87	0.77
gi|16131601			2.79	1.71	1.5
gi|16129242			4.65		1.38	0.99
gi|16130405			5.58	1.66	1.48	0.67
gi|16131424			4.99		1.84	0.7
gi|16131636			4.73	3.69		0.59
gi|16131777			5.23	1.21	1.62
gi|16131994			3.09	1.5	2.21	0.86
gi|16128047			2.26	2.62	1.66	0.21
gi|16128178			2.93	1.04	2.98
gi|16129184			5.83
gi|16129957			10.34	5	3.36	1.07
gi|16128017			3.52		1.2	0.36
gi|16128715			3.59	3.19	1.83
gi|16128879			9.47	3.4	2.71	0.89
gi|16128982			4.43
gi|16129375			7.34
gi|16130586			11.41	7.57	3.29	1.97
gi|16128114			3.24		1.32
gi|16128126			0.7	1.52	0.84
gi|16128772			2.94		1.26	1.65
gi|16129197			1.08	5.67		1.72
gi|16129265			3.13	2.29
gi|16130219			5.22	3.27	2.01
gi|16130993			22.03	10.42	8.14	3.25
gi|16131511			2.94		1.33
gi|16131612			4.76	1.97		0.66
gi|16132077			2.4	2.25	1.65	0.98
gi|16128097			5.93		3.19
gi|16128156			4.67		0.74
gi|16128371			1.7	2.07
gi|16128354			1.7		1.94
gi|16128578			9.77		3.02
gi|16128819			6.46
gi|16129182			3.3
gi|16129438			1.8
gi|16130901			2.95
gi|16130930			2.3
gi|16131336			2.3		2.37	0.43
gi|16131520			1.86
gi|16131664			3.11	2.07
gi|16131776			2.41
gi|16131835			2.23
gi|16128206			10.73	4.17		2.15
gi|16129033			1.17
gi|16129066			8.32			1.12
gi|16129166			0.95
gi|16129596			10.68
gi|16131123			5.69		3.14	1.16
gi|16131690			3.98		2.07
gi|16131885			4.02	3.29	2.75
gi|16128087			3.2
gi|16128192			1.24
gi|16128229			2.35
gi|16128417			1.96	1.35	1.35
gi|16128442			0.75
gi|16129095			5.34
gi|16129137			6.37		2.2
gi|16129294			4.2		5.54
gi|16129381			1.17
gi|16129501			3.21
gi|16129802			4.47	1.59	1.17	0.58
gi|16129814			2.77
gi|16129864			2.46
gi|16129989			2.69
gi|16129976			2.69	1.74
gi|16130341			2.04		1.8
gi|16130374			0.63
gi|16130427			6.12	6.53
gi|16130607			5.29
gi|16130684			5.24		1.69
gi|16131131			4.78
gi|16131567			2.59	2.63	3.04	0.33
gi|16131708			3.02	2.2		0.7
gi|16131985			5.6	1.23	2.09
gi|16132082			4.83	2.73	1.95	1.01
gi|16132191			4.63
gi|16128000			3.45
gi|16128043			2.28
gi|16128150			2.21
gi|16128153			3.34
gi|16128393			0.25
gi|16128464			2.14
gi|16128632			2.14
gi|16128652			7.69
gi|16128649			7.69
gi|16128949			5.15
gi|16128975			4.31
gi|16129029			5.96	1.95		1.04
gi|16129082			4.64	2.16
gi|16129103			4.1
gi|16129098			4.1
gi|16129141			8.74
gi|16129421			4.63
gi|16129429			2.78
gi|16129609			2.7
gi|16129681			0.39
gi|16129689			3.53
gi|16129785			1.92			0.58
gi|16129860			3.51	2.61		0.76
gi|16129914			2.06
gi|16130088			6.39
gi|16130087			6.39
gi|16130124			5.1
gi|16130296			4.09
gi|16130327			12.71
gi|16130363			1.57
gi|16130353			1.57
gi|16130545			1.48
gi|16130589			0.91
gi|16130596			3.96
gi|16130703			2.45
gi|16130781			3.71
gi|16130823			2.51
gi|16130874			1.88
gi|16130964			5.14
gi|16131029			3.34
gi|16131038			2.63
gi|16131070			2.29
gi|16131089			3.51
gi|16131225			2.98		1.53
gi|16131227			4.4
gi|16131273			1.34			0.25
gi|16131661			9.51
gi|16131648			9.51
gi|16131679			1.68		1.92
gi|16131715			2.46
gi|16131942			0.54
gi|16131992			0.75
gi|16132118			4.53
gi|16132258			4.9
gi|16132251			4.9
gi|16131860				6.63	2.97	0.88
gi|16130231				3.34	3.51	1.79
gi|16128638				2.35	1.63	0.91
gi|16130389				2.77	6.43
gi|16128424				2.38	4.31
gi|16129138				2.62		0.63
gi|16131280				9.34	4.89
gi|16129441				8.1	5.88	2.75
gi|16131476				0.44
gi|16131752				3.58	2.68
gi|16128091				3.75	2.38	0.66
gi|16128438				2.37	3.97	2.39
gi|16129219				20.54		8.3
gi|16131997				0.93	1.26	0.74
gi|16128154				1.99	2.91
gi|16128404				6.82		1.63
gi|16128712				1.91		0.66
gi|16128939				3.19
gi|16129604				2.52
gi|16130069				7.93	2.84	1.97
gi|16131094				1.79	2.76	0.64
gi|16128025				1.85	1.32
gi|16128071				1.21
gi|16128078				3.74	2.04
gi|16128554				0.79		0.48
gi|16128832				1.75
gi|16129091				2.31
gi|16129090				2.31
gi|16129408				0.6
gi|16129875				2.3
gi|16130987				0.64
gi|16131327				3.8
gi|16131764				1.91
gi|16128447				0.44
gi|16128550				11.96
gi|16128685				2.48		0.86
gi|16128777				0.25
gi|16129047				1.68	1.51
gi|16129094				1.55		0.5
gi|16129150				1.78
gi|16129157				0.82
gi|16129162				2.38		1.12
gi|16129337				0.54	6.28
gi|16129473				0.38
gi|16129979				0.91
gi|16130048				0.48
gi|16130335				0.42
gi|16130373				3.2		0.18
gi|16130652				1.35
gi|16130906				1.69
gi|16130860				1.69
gi|16130947				1.05
gi|16131073				0.76	1.06
gi|16131083				2.36
gi|16131100				1.68
gi|16131134				1.68	0.63
gi|16131358				4.22
gi|16131372				2.82
gi|16131385				0.94
gi|16131421				1.18
gi|16131443				3.22
gi|16131436				3.22
gi|16131523				0.41
gi|16131560				0.58
gi|16131684				1.57
gi|16131867				2.88		0.86
gi|16131845				2.88
gi|16132213				3.44
gi|16128831					1.73	1.21
gi|16130825					1.79
gi|16128643					2.3
gi|16130593					1.62
gi|16129866					0.92
gi|16130800					2.69
gi|16131704					1.22
gi|16131795					1.03	0.69
gi|16128641					2.2
gi|16128659					1.46
gi|16130438					3.29
gi|16132024					1.65
gi|16128650					3.02	1.92
gi|16128997					2.06
gi|16129022					4.16
gi|16129572					3.42
gi|16129805					0.87	0.86
gi|16129834					1.53	0.38
gi|16130393					1.33
gi|16131431					2.58
gi|16129571					1.72
gi|16129595					1.45
gi|16129605					2.29
gi|16129858					2.03
gi|16130021					0.89	0.79
gi|16130167					1
gi|16130235					2.05
gi|16130489					1.87
gi|16130515					0.52
gi|16130858					0.97
gi|16131006					2.16	1.06
gi|16131065					1.27	0.44
gi|16131082					3.03	0.9
gi|16131263					2.37
gi|16132001					1.63
gi|16132193					2.18
gi|16132057					2.18	0.81
gi|16128160					1.71
gi|16128188					0.66
gi|16128230					0.96
gi|16128299					1.37
gi|16128309					2.52
gi|16128489					1.91
gi|16128505					37.79
gi|16128581					1.06
gi|16128729					2.22
gi|16128753					1.65	0.83
gi|16128967					0.66
gi|16128956					0.66
gi|16129241					2
gi|16129339					0.96
gi|16129290					0.96
gi|16129380					5.76
gi|16129497					2.56
gi|16129939					1.19
gi|16130031					1.87	0.79
gi|16130143					0.81
gi|16130360					4.4	0.57
gi|16130502					7.62
gi|16130610					0.43
gi|16130575					0.43	2.9
gi|16130597					0.43
gi|16130654					5.97
gi|16130956					2
gi|16131048					2.36
gi|16131099					2.74
gi|16131160					2.2
gi|16131163					1.32
gi|16131202					0.73
gi|16131278					1.75
gi|16131309					8.21
gi|16131310					0.34
gi|16131413					1.24
gi|16131479					1.53
gi|16131598					1.59	0.72
gi|16131751					0.95
gi|16131682					0.95
gi|16131692					0.95
gi|16131830					1.68
gi|16131863					1.38
gi|16131857					1.38
gi|16132133					1.73
gi|16132120					1.73
gi|16132192					0.59
gi|16132169					0.59
gi|16128875						0.56
gi|16129390						1.15
gi|16130166						0.6
gi|16130216						0.61
gi|16130848						0.71
gi|16128193						2.15
gi|16128662						0.9
gi|16128833						2.61
gi|16128996						0.62
gi|16129188						8.3
gi|16129569						0.47
gi|16129817						0.33
gi|16130254						0.84
gi|16130302						0.66
gi|16130811						0.87
gi|16130910						1.06
gi|16131062						0.95
gi|16131296						0.54
gi|16128033						0.21
gi|16128083						0.7
gi|16128343						0.33
gi|16128274						0.33
gi|16128571						0.95
gi|16128626						2.11
gi|16128739						0.83
gi|16128750						0.83
gi|16129126						0.63
gi|16129233						0.81
gi|16129487						0.36
gi|16129574						0.22
gi|16129739						0.26
gi|16129778						0.45
gi|16129763						0.45
gi|16129924						3.58
gi|16130106						0.19
gi|16130084						0.19
gi|16130170						31.82
gi|16130366						0.57
gi|16130377						0.18
gi|16130412						0.4
gi|16130544						0.67
gi|16130680						0.68
gi|16130852						0.68
gi|16130960						0.18
gi|16131011						0.45
gi|16131088						0.33
gi|16131095						0.78
gi|16131216						1.05
gi|16131354						0.43
gi|16131488						0.2
gi|16131500						0.45
gi|16131966						0.28
gi|16131842						0.28
gi|16131875						0.28
gi|16131905						0.28
gi|16132002						0.92
gi|16132049						0.81

## Sheet: BW25113 Oxidative Stress
LOCUS	5min	15min	30min	45min	60min
gi|16131218	136.96	198.52	127.17	236.35	177.76
gi|16131678	82.66			11.08
gi|16131576		5.12		15.78
gi|16131219	30.37	15.42	9.92	7.81	32.48
gi|16129452	1.31	3.2	0.58	2.12
gi|16128878	2.29	2.23	1.82		5.87
gi|16128107	0.9	10.26	4.92	4.28
gi|16128896	3.94	3.98	129.2	355.02	352.73
gi|16131968	7.22	2.15	6.59	3.68	4.92
gi|16131632	3.83	9.67	1.9	7.45	13.72
gi|16130686	14.43	0.45	3.5	9.17	87.82
gi|16130152	3.26				264.99
gi|16130340	23.08	1.85	193.37	84.26	83.92
gi|16131710	78.46	18.34		12.89	1.1
gi|16129204	9.94	10.37	24.84	18.9	1.17
gi|16132067	6.04	83.68	59.62	14.62	5.91
gi|16131102	5.93	6	4.84	2.62	0.96
gi|16129202	2.69	7.33	0.34	1.87	0.84
gi|16131817	0.44		1.51	14.11	5.05
gi|16131818	5.84	14.42	13.75	0.9	10.47
gi|16128870	7.81		14.81	7.15	0.01
gi|16129099	43.14	0.3	81.2		208.62
gi|16131332	7.81	12.44		11.32	15.66
gi|16130033	3.33	4.42	8.41	16.84
gi|16128111	19.93		7.95
gi|16131840	0.39	18.38		5.88
gi|16131794	0.82	22.83	0.37	4.65
gi|16130342	2.61	3.56	7.61
gi|16131174	58.15				0.43
gi|16129632	16.91		0.75	1.67	0.41
gi|16128027	1.9	9.68	6.23	14.71	2.74
gi|16128008	1.46			14.93	1.74
gi|16128108	21.1	0.02	36.52	4.73	2.98
gi|16131416	4.85		52.96	2.44	6.27
gi|16131182	228.31	153.87	129.84	241.17	318.04
gi|16127998	26.04	4.47	18.99	4.95
gi|16128162	5.86		62.18	66.33	1.2
gi|16128190	1.52	114.26	102.39	167.29	70.8
gi|16130513	1.03	7.23	2.11	3.33	2.08
gi|16130826	62.84
gi|16129237	0.74	4.87		4.26	8.47
gi|16131184	1.79	119.74		0.73	183.09
gi|16129686	1.61	46.87	92.27	7.37	46.06
gi|16131103		7.1		5.58	0.13
gi|16129285	12.36	0.36	314.58	235.34	143.29
gi|16131063	4.2	1.12	16.13	0.61	0.58
gi|16131999	0.99		2.69	2.27
gi|16128703	17.36		3.53	2.89	54.99
gi|16131177	34.73	29.71	11.61		55.16
gi|16131180	43.54				236.5
gi|16130527	0.76			2.03
gi|16131815	89.8	4.89			137.42
gi|16131780	5.95	2.18	13.68		21.13
gi|16131430	0.16		4.7	0.02	0.01
gi|16130671	2.09	1.14	2.35	1.68	3.26
gi|16130604	0.66			0.23
gi|16131680	14.47
gi|16128698	48.97	1.88	1.45
gi|16128187	11.08	2.82
gi|16129867	2.01	3.44		2.98	46.01
gi|16131836	1.59
gi|16128722	1.57	0.28	1.38
gi|16130432	1.41
gi|16128066	5.47			0.18	0.08
gi|16128159	5.38	6.65	9.24	11.15	85.27
gi|16129411	1.54	6.26	4.02	1.17	7.3
gi|16129941	13.33	16.51	0.8
gi|16129222	2.04	7.82	2.73
gi|16129693	0.66
gi|16129807	1.22		4.8		8.13
gi|16130482	2.85		1.71	4.92	2.78
gi|16131748		91.12		66.78	72.53
gi|16132201	1.72	7.49			5.57
gi|16128874			0.51	1.56	22.24
gi|16130390	8.05	1.76		11.01
gi|16131221	4.38			3.31
gi|16131120	13.87
gi|16128223	1.37		15.8		336.94
gi|16129047	0.73				1.24
gi|16129670	4.78			2.58
gi|16132208	2.97	0.02	6.74
gi|16128310	1.58	0.62	41.28	153.02	111.37
gi|16131754	0.3		2.76	0.27	0.72
gi|16128780	69.68	78.15	48.2	43.21	19.61
gi|16129198	246.64			0.55	105.23
gi|16131483	10.53
gi|16129178	1.61	54.2	1.57	1.17	11.14
gi|16132074	0.5	1.84	0.25		14.27
gi|16128716	1.84	1.03
gi|16129805	1.67			0.63
gi|16130093	3.64		1.44	1.31
gi|16131068	0.2			0.12	0.1
gi|16131597	15.25	3.54	7.58	3.61
gi|16129064	1.9
gi|16130670	6.18			11
gi|16130455	0.69	2.24	4.91	3.81	0.66
gi|16128864	15.32	66.55
gi|16130343	22.36		9.76	4.26	21.97
gi|16131293	2.82		4.24		2.31
gi|16130443	2.03			1.64
gi|16132234	1.05
gi|16132048	6.02				3.44
gi|16128127	1.93	12.84		4.15	19.04
gi|16130839	2.2		1.29		1.33
gi|16128855	33.86			27.16
gi|16128178	38.09	0.68	1.55
gi|16128423	3.81		4.19
gi|16128715	4.35				5.89
gi|16131370	2			1.07
gi|16128114	6.33
gi|16128119	1.67	4.47	5.23		4.38
gi|16128170	3.37		7.67
gi|16129658	0.22	8.15			7.98
gi|16130320	7.68			7.35	0.98
gi|16131778	1.46
gi|16131628	21.58	2.44	1.32
gi|16132222	3.86	5.5	4.46
gi|16128065	2.08				12.03
gi|16130251	0.23	0.84
gi|16131769	16.71
gi|16128708	0.03	0.03	9.78	0.05
gi|16129570	28.82			1.77
gi|16129593	6.23	3.16	5.22	3.83	7.34
gi|16128769	3.91	0.61		1.16	5.04
gi|16129337	4.14
gi|16129438	4.46
gi|16131704	0.66
gi|16128097	16.11
gi|16128822	0.37
gi|16131186	40.4				89.39
gi|16128154	0.03			3.36
gi|16129030	0.24	0.6	0.84	0.68	1.13
gi|16129341	2.96	2		8.1	6.87
gi|16129802	0.72				2.11
gi|16130876	4.06
gi|16131282	2.12	6.45			7.96
gi|16128731	0.53	6.41	4.43	5.43	10.14
gi|16129265	0.42
gi|16130338	23.84
gi|16130738	0.64	11.37		7.1
gi|16131531	2.12			0.38	7.84
gi|16131994	0.74		8.44		10.04
gi|16130531	0.43
gi|16131091	5.06
gi|16128741	1.08
gi|16129620	0.21				4.76
gi|16128645	0.15
gi|16130264	0.39
gi|16129616	0.93	1.52		0.87
gi|16129886	1.19
gi|16129974	7.09
gi|16130118	0.68
gi|16130174	0.77
gi|16130393	1.76		3.67	4.63	3.15
gi|16131302	1.88
gi|16131327	3.4				4.62
gi|16131326	3.4				4.81
gi|16131470	3.23
gi|16131488	1.19				7.17
gi|16131803	1.28
gi|16129741	8.3			7.18
gi|16129893	0.63
gi|16130348	1.08				13.36
gi|16130515	0.16			0.35	0.19
gi|16130852	0.59				2.38
gi|16131300	0.48	0.39		0.43
gi|16131463	0.42
gi|16131459	0.42
gi|16132189	3.6
gi|16128000	6.24
gi|16128671	29.28
gi|16129228	0.1	6.56
gi|16129600	0.28
gi|16130204	0.57
gi|16131498	0.36
gi|16131551	0.78
gi|16131523	0.78
gi|16131730	18.08
gi|16130827		1.59	1.29		77.92
gi|16129733		2.47			226.7
gi|16131175		305.62	237.83	235.56	407.47
gi|16132025		185.34	3.54	43.45
gi|16131126		40.97	4.19		537.16
gi|16131814		454.96	247.97		353.4
gi|16128970		8.74	377.83	1.53
gi|16131841		44.61	93.32
gi|16131757		36.66	5.9	3.2	18.31
gi|16128924		7.04	158.96		108.86
gi|16131198		308.95	422.8		358.93
gi|16128588		231.38	230.33	36.05	150.31
gi|16131187		192.49	10.11	0.41
gi|16128782		103.48	60.69	128.34	37.9
gi|16131600		0.57		4.79	30.74
gi|16131185		0.09		0.1
gi|16128723		180.66		181.12	116.48
gi|16128695		135.69	33.03	5.3
gi|16127996		5.47	1.08		4.67
gi|16130034		8.21		8.51
gi|16128421		20.56	22.07	3.75
gi|16129715		2.81	3.28	3.22	4.99
gi|16128895		5.73	4.41	9.74	17.14
gi|16129249		22.96
gi|16131196		0.81
gi|16132066		36.12		3.11	0.47
gi|16130423		17.3	3.03	14.94	8.69
gi|16129870		7.57	5.57	11.38	40.03
gi|16130433		8.5		2.49	3.39
gi|16130245		2.86			50.84
gi|16128779		20.39	48.49	14.27	30.06
gi|16129669		9.5	1.45	6.48
gi|16132218		18.11
gi|16131779		13.3	4.62	5.58
gi|16128411		2.13	0.07		33.8
gi|16130836		7.96	5.09		15.47
gi|16131215		4.47			9.82
gi|16128020		0.25	4.29		0.6
gi|16129027		77.2
gi|16128650		1.35	4.97
gi|16128897		5.43			2.36
gi|16128068		1.88
gi|16131601		4.71			107.05
gi|16131139		8.23		2.76
gi|16128208		0.31			7.57
gi|16128699		1.64			6.65
gi|16129056		1.56
gi|16129138		3.18		0.72
gi|16130388		12.93	10.11
gi|16131238		2.92			5.67
gi|16129960		5.8
gi|16128088		17.52	9.26		22.77
gi|16128548		2.19
gi|16128625		1.36	1.11	2.04	1.1
gi|16128638		7.52			7.18
gi|16128656		3.09	3.96	8.97
gi|16130904		10.1
gi|16128322		3.17			1.75
gi|16128806		5.91
gi|16130232		0.99		7.68	0.04
gi|16130350		0.02			27.11
gi|16131850		4.72
gi|16129224		1.5	6.17	8.67	1.3
gi|16129242		5.48
gi|16130599		286.49			131.65
gi|16130606		11.46	0.79		4.77
gi|16131183		2.22
gi|16128258		23.32	0.62		17.58
gi|16129803		33.02	10.8
gi|16130576		2.46	0.48
gi|16128590		2.34	2.98	3.44	0.18
gi|16129963		4.15	3.12		23.34
gi|16131755		3.28	6.73
gi|16129054		1.47		3.65	6.53
gi|16129071		0.91
gi|16130424		4.21	6.71
gi|16131304		1.77	1.78		1.27
gi|16131752		0.64	0.59	1.02	0.52
gi|16131796		15.31
gi|16128860		0.81	0.4
gi|16128912		4.08	1.81
gi|16129011		0.29		0.64
gi|16129086		7.48			5.04
gi|16129093		7.53	1.39	9.19
gi|16130659		1.57
gi|16128147		4.06			1.43
gi|16129866		4.97			6.53
gi|16131195		98.45
gi|16128507		10.07
gi|16128819		2.44			3.05
gi|16130405		6.77
gi|16130492		29.27	0.13		3.97
gi|16131067		16.37
gi|16131482		5.36
gi|16129968		2.72
gi|16130197		1.31
gi|16130793		0.46
gi|16131592		3.77
gi|16131795		2.22
gi|16128576		4.59
gi|16129718		1.51	4.47	4.81
gi|16130909		14.22			1.97
gi|16131767		0.74	0.75	0.87	1.44
gi|16132041		0.13
gi|16128354		1.8	2.26
gi|16128404		0.4
gi|16128831		12.6	3.72		4.42
gi|16129781		0.78
gi|16129978		3.54
gi|16131598		0.31
gi|16128192		5.63
gi|16128653		7.44
gi|16128663		8.03
gi|16130030		0.13			0.04
gi|16130228		2.13			2.51
gi|16131059		9.73			8.54
gi|16129408		2.71	0.08	1.34	3.35
gi|16129763		0.38
gi|16129833		1.46
gi|16129965		4.05
gi|16130351		0.7
gi|16130494		0.73
gi|16131048		12.89
gi|16131160		3.66			2.83
gi|16131596		4.24
gi|16132076		2.07			13.74
gi|16128143		0.73			0.65
gi|16129636		6.38
gi|16130239		1.43		0.15
gi|16132002		0.69
gi|16129022		1.4			1.73
gi|16130246		1.05
gi|16130441		0.33	0.34		0.33
gi|16128578		3.64
gi|16128891		0.55
gi|16128888		0.55			0.06
gi|16129642		0.02	0.02
gi|16130114		22.2
gi|16130803		0.82
gi|16131568		0.14		0.29
gi|16128022		12.74	0.66
gi|16128078		1.18
gi|16128409		2.13
gi|16128425		11.78
gi|16128442		1.11
gi|16128558		4.34			6.86
gi|16129171		1.83
gi|16130849		0.14	0.22
gi|16131000		4.65
gi|16131297		3.58
gi|16131462		1.33
gi|16131834		4.34
gi|16128454		3.17
gi|16128598		2.82
gi|16129139		9.09
gi|16129206		0.51
gi|16129361		1.27
gi|16129381		5.96
gi|16129417		2.64
gi|16129631		1.03
gi|16129624		1.03
gi|16130014		43.5
gi|16130282		4.73
gi|16130642		14.3
gi|16130706		2.87
gi|16131399		1.1
gi|16131376		1.1
gi|16131854		4.87
gi|16132050		1.33
gi|16132049		1.33
gi|16132251		0.26
gi|16131193			353.84
gi|16128163			4.92	4.15	5.08
gi|16131602			0.62	19.47	0.21
gi|16128002			1.06		20.53
gi|16128109			3.04		44.8
gi|16129221			1.85
gi|16129970			7.17
gi|16130814			18.3
gi|16130258			0.66	6.77	11.87
gi|16129025			8.75
gi|16131813			19.92
gi|16131812				20.02	4.52
gi|16130389			4.6	8.27
gi|16129376			7.38	10.82
gi|16131060			9.21	0.29	2.44
gi|16131236			44.15		17.42
gi|16130792			4.79	0.3
gi|16131880			16.59
gi|16128701			8.46	0.46	0.66
gi|16129737			1.14		1.29
gi|16128856			3.57
gi|16131711			2.75	29.56
gi|16128536			227.43
gi|16129225			3.9	4.74
gi|16129498			0.56
gi|16129838			58.6
gi|16130244			3.16	11.86	10.01
gi|16131330			0.09	0.85
gi|16128171			12.29		109.11
gi|16128419			140.47
gi|16131877			3.38	0.7
gi|16128026			1.78		13.11
gi|16128126			3.07		6.65
gi|16128615			10.97
gi|16130800			1.31		1.35
gi|16130504			0.95
gi|16131798			5.61
gi|16128438			41.67
gi|16129562			6.25		4.74
gi|16129572			2.38
gi|16131797			6.24
gi|16128067			1.51
gi|16128457			6.75
gi|16129595			0.49
gi|16129773
gi|16130521			0.48		2.89
gi|16130221			5.48
gi|16130931			0.9		5.67
gi|16128787			0.86		3.48
gi|16128968			4.29
gi|16129055			3.01	4.11
gi|16129734			62.12
gi|16130658			0.99		58.49
gi|16130687			1.65
gi|16130843			5.69		14.2
gi|16131764			7.34
gi|16131955			3.16	5.96
gi|16129390			4.28
gi|16128396			2.11
gi|16129596			0.35		0.52
gi|16129819			4.26		1.17
gi|16130229			0.91
gi|16130458			3.56	2.07
gi|16130858			6.26
gi|16130993			251.45		106.31
gi|16128899			4.38
gi|16129207			1.58
gi|16129247			11.11
gi|16128996			1.41
gi|16130169			3.56
gi|16131425			0.21
gi|16129858			0.82
gi|16131144			0.26
gi|16132082			3.25
gi|16128091			3.49
gi|16128113			32.02
gi|16128664			49.44
gi|16128735			5.28
gi|16128838			0.89		0.74
gi|16130255			5.98
gi|16131262			4.39		1.06
gi|16129948			53.32	4.17	32.81
gi|16129957			6.55
gi|16130218			3.23		3.41
gi|16129232			0.83		0.38
gi|16130963			0.95
gi|16131637			0.16
gi|16131974			0.08
gi|16128156			8.23
gi|16128982			2.97
gi|16129163			0.48		0.41
gi|16130005			2.04		12.39
gi|16128102			1.88
gi|16128510			0.23
gi|16128589			15.1
gi|16129837			1.39
gi|16130121			0.04
gi|16130225			8.59
gi|16130505			0.34
gi|16130600			0.44		2.66
gi|16131303			0.79	1.85	1.68
gi|16131862			1.59
gi|16128729			1.52		1.4
gi|16130510			1.16
gi|16130731			1.63
gi|16131799			2.37
gi|16131800			3.01	1.31	1.53
gi|16129679			0.65
gi|16129779			3.21
gi|16129835			1.47		1.68
gi|16129834			1.47
gi|16129926			9.62
gi|16129927			2.55
gi|16130062			0.17
gi|16130724			1.4
gi|16130720			1.4		0.03
gi|16131685			0.45	0.19
gi|16131708			0.21	0.12
gi|16128320			6.47
gi|16128374			1.18
gi|16128332			1.18
gi|16128603			2.69
gi|16128619			0.38
gi|16128693			0.31
gi|16128680			0.31
gi|16128727			5.89		3.91
gi|16128927			2.15
gi|16129250			0.53
gi|16129302			1.36
gi|16129476			4.64
gi|16129578			2.72
gi|16129668			1.2
gi|16129673			1.42
gi|16129717			2.93
gi|16129828			1.23
gi|16129825			1.23
gi|16129850			0.23
gi|16129972			0.94
gi|16130219			0.38
gi|16130635			0.32
gi|16130693			0.17
gi|16130713			14.21
gi|16130897			0.29
gi|16130922			0.34
gi|16130997			2.45
gi|16131036			0.71
gi|16131106			15.8
gi|16131096			15.8
gi|16131163			1.63		5.79
gi|16131272			1.72
gi|16131312			0.61
gi|16131465			1.95		1.14
gi|16131464			1.95
gi|16131572			1.54
gi|16131851				0.4	5.24
gi|16130091				43.9
gi|16128702				2.05	4.5
gi|16128509				0.53
gi|16131061				5.96	3.59
gi|16132080				3.53
gi|16131176				1.26
gi|16131280				4.45
gi|16129441				10.17	48.79
gi|16130825				1.85
gi|16128400				4.78	7.89
gi|16131567				6.25
gi|16131603				1.04
gi|16131541				8.31	4
gi|16131629				3.37
gi|16129058				5.2
gi|16130810				11.69
gi|16131979				2.02
gi|16131480				95	142.9
gi|16128164				0.67	8.1
gi|16131066				0.07
gi|16131367				3.79	56.58
gi|16128839				9.76
gi|16131835				1.27
gi|16128561				10.01
gi|16131431				3.12	8.37
gi|16130154				0.54
gi|16132200				1.76
gi|16128047				3.46	1.77
gi|16129184				2.56	2.28
gi|16131124				1.2
gi|16131734				0.56
gi|16131705				0.04	3.13
gi|16129403				0.82
gi|16130456				8.7	7.4
gi|16128393				1.73
gi|16129090				0.25
gi|16129472				0.02
gi|16131728				0.97
gi|16131895				6.13
gi|16131986				2.69
gi|16129077				10.57
gi|16131079				2.58
gi|16131402				2.03
gi|16128230				12.8
gi|16129029				0.44
gi|16128309				1.07
gi|16128529				0.33
gi|16128520				0.33
gi|16128525				0.33
gi|16128673				0.06
gi|16128932				1.22
gi|16129263				12.78
gi|16129687				4.64
gi|16129758				1.19
gi|16129840				0.04
gi|16130203				0.28
gi|16130496				3.62
gi|16130822				5.3
gi|16131500				0.18
gi|16131633				0.2
gi|16130476					1.38
gi|16131220					1.36
gi|16131194					19.21
gi|16130035					2.25
gi|16128422					2.53
gi|16130815					166.25
gi|16130201					191.22
gi|16129694					5.39
gi|16128173					106.27
gi|16128828					15.37
gi|16132194					73.97
gi|16132198					117.32
gi|16131612					0.72
gi|16130533					2.03
gi|16128660					26.91
gi|16128807					6.68
gi|16129577					2.76
gi|16128651					1.92
gi|16130586					56.62
gi|16128476					0.38
gi|16129294					8.92
gi|16128071					7.21
gi|16129208					12.07
gi|16129235					0.4
gi|16131115					3.51
gi|16131515					3.76
gi|16131997					2.21
gi|16129050					19.07
gi|16129964					2.55
gi|16131226					7.73
gi|16129638					8.03
gi|16131071					0.27
gi|16128314					2.68
gi|16128577					11.59
gi|16128746					4
gi|16129961					4.44
gi|16130081					6.64
gi|16130848					1.33
gi|16129157					10.72
gi|16130530					1.5
gi|16130859					2.7
gi|16130906					23.48
gi|16131679					19.04
gi|16128877					20.05
gi|16129182					1.51
gi|16129373					10.01
gi|16129581					15.93
gi|16130222					1.29
gi|16130863					2.88
gi|16130924					1.98
gi|16129095					19.57
gi|16129640					3.53
gi|16129033					0.06
gi|16129218					0.9
gi|16128373					12.8
gi|16128676					5.06
gi|16128772					3.65
gi|16129549					3.56
gi|16129814					5.49
gi|16130031					2.83
gi|16130274					1.28
gi|16130954					0.6
gi|16131038					0.5
gi|16131506					0.27
gi|16131762					5.21
gi|16131789					0.53
gi|16132038					4.01
gi|16132024					4.01
gi|16128030					11.17
gi|16128085					0.48
gi|16128196					0.84
gi|16128340					1.59
gi|16128790					5.82
gi|16129174					16.65
gi|16129286					0.24
gi|16129346					1.42
gi|16129785					6.91
gi|16129861					0.21
gi|16130383					3.15
gi|16130543					4.18
gi|16130866					2.3
gi|16131217					0.46
gi|16131331					3
gi|16131360					0.92
gi|16131635					0.81
gi|16131617					0.81
gi|16131806					0.14
gi|16131884					1.2
gi|16131887					0.4
gi|16131924					0.21
gi|16131307
gi|16131188
gi|16131121
gi|16131200
gi|16132022
gi|16129672
gi|16131056
gi|16129170
gi|16131604
gi|16130032
gi|16131173
gi|16129771
gi|16131192
gi|16131123
gi|16130020
gi|16129193
gi|16129982
gi|16128879
gi|16129633
gi|16130437
gi|16130583
gi|16131581
gi|16130506
gi|16128019
gi|16128226
gi|16129338
gi|16129137
gi|16130838
gi|16131336
gi|16131519
gi|16131690
gi|16130446
gi|16130823
gi|16130899
gi|16131413
gi|16128733
gi|16130669
gi|16128753
gi|16129083
gi|16129177
gi|16131088
gi|16131127
gi|16128137
gi|16128177
gi|16130191
gi|16130662
gi|16130855
gi|16131396
gi|16131382
gi|16131397
gi|16131493
